# Supplementary material for: Periodontal Disease and Pregnancy Outcomes: Overview of Systematic Reviews
Source: PubMed Central journal article supplement — JDR Clin Trans Res. 2017 Sep 25;3(1):10–27. doi: 10.1177/2380084417731097 (PMC6191679; doi:10.1177/2380084417731097), 2017-09-25
Supplement: DS_10.1177_2380084417731097.pdf [file DS_10.1177_2380084417731097.pdf]

## **Periodontal Disease and Pregnancy Outcomes: Overview of Systematic Reviews**

L.A. Daalderop, B.V. Wieland, K. Tomsin, L. Reyes, B.W. Kramer, S.F. Vanterpool, and J.V. Been

### **Appendix**

#### Additional References

Chambrone L, Guglielmetti MR, Pannuti CM, Chambrone LA. 2011. Evidence grade associating periodontitis to preterm birth and/or low birth weight: I. A systematic review of prospective cohort studies. *J Clin Periodontol.* 38(9):795-808.

Conde-Agudelo A, Villar J, Lindheimer M. 2008. Maternal infection and risk of preeclampsia: systematic review and metaanalysis. *Am J Obstet Gynecol.* 198(1):7-22.

Corbella S, Del Fabbro M, Taschieri S, Francetti L. 2012a. Periodontal disease and adverse pregnancy outcomes: A systematic review. *Ital Oral Surg.* 11(4):132-46.

Corbella S, Taschieri S, Francetti L, De Siena F, Del Fabbro M. 2012b. Periodontal disease as a risk factor for adverse pregnancy outcomes: a systematic review and meta-analysis of case-control studies. *Odontol.* 100(2):232-40.

Corbella S, Taschieri S, Del Fabbro M, Francetti L, Weinstein R, Ferrazzi E. 2016. Adverse pregnancy outcomes and periodontitis: A systematic review and meta-analysis exploring potential association. *Quintessence Int.* 47(3):193-204.

Huang X, Wang J, Liu J, Hua L, Zhang D, Hu T, Ge ZL. Maternal periodontal disease and risk of preeclampsia: a meta-analysis. 2014. *J Huazhong Univ Sci Technolog Med Sci.* 34(5):729-35.

Ide M, Papapanou PN. 2013. Epidemiology of association between maternal periodontal disease and adverse pregnancy outcomes--systematic review. *J Periodontol.* 84(4 Suppl):181S-94S.

Khader YS, Ta'ani Q. 2005. Periodontal diseases and the risk of preterm birth and low birth weight: a meta-analysis. *J Periodontol.* 76(2):161-5.

Konopka T, Paradowska-Stolarz A. 2012. Periodontitis and risk of preterm birth and low birthweight-a meta-analysis. *Ginekol Pol.* 83(6):446-53.

Kunnen A, Doormaal JJ, Abbas F, Aarnoudse JG, Pampus MG, Faas MM. 2010. Periodontal disease and pre-eclampsia: a systematic review. *J Clin Periodontol.* 37(12):1075-87.

Madianos PN, Bobetsis GA, Kinane DF. 2002. Is periodontitis associated with an increased risk of coronary heart disease and preterm and/or low birth weight births? *J Clin Periodontol.* 29(Suppl 3):22-38.

Oliveira AMSDd, Moreira AN, Oliveira PAD, Costa FdO. 2009. Doença periodontal materna e parto pré-termo e/ou baixo peso ao nascimento: revisão de literatura. *Periodontia.* 19(2):21-31.

- Rustveld LO, Kelsey SF, Sharma R. 2008. Association between maternal infections and preeclampsia: A systematic review of epidemiologic studies. *Matern Child Health J.* 12(2):223-42.
- Sanchez AR, Kupp LI, Sheridan PJ, Sanchez DR. 2004. Maternal chronic infection as a risk factor in preterm low birth weight infants: the link with periodontal infection. *J Int Acad Periodontol.* 6(3):89-94.
- Scannapieco FA, Bush RB, Paju S. 2003. Periodontal disease as a risk factor for adverse pregnancy outcomes. A systematic review. *Ann Periodontol.* 8(1):70-8.
- Sgolastra F, Petrucci A, Severino M, Gatto R, Monaco A. 2013. Relationship between periodontitis and pre-eclampsia: a meta-analysis. *PLoS One.* [accessed 2017 May 15];8(8):e71387.  
<http://journals.plos.org/plosone/article/file?id=10.1371/journal.pone.0071387&type=printable>.  
doi: 10.1371/journal.pone.0071387.
- Teshome A, Yitayeh A. 2016. Relationship between periodontal disease and preterm low birth weight: systematic review. *Pan Afr Med J.* [accessed 2017 May 15];24(1):215.  
<http://www.panafrican-med-journal.com/content/article/24/215/full/#.WRni81KiF-U>.  
doi:10.11604/pamj.2016.24.215.8727
- Vergnes J-N, Sixou M. 2007. Preterm low birth weight and maternal periodontal status: a meta-analysis. *Am J Obstet Gynecol.* 196(2):135.e1-e7.
- Vettore MV, Lamarca Gde A, Leao AT, Thomaz FB, Sheiham A, Leal Mdo C. 2006. Periodontal infection and adverse pregnancy outcomes: a systematic review of epidemiological studies. *Cad Saude Publica.* 22(10):2041-53.
- Wei B-J, Chen Y-J, Yu L, Wu B. 2013. Periodontal disease and risk of preeclampsia: a meta-analysis of observational studies. *PLoS One.* 8(8):e70901.
- Wimmer G, Pihlstrom BL. 2008. A critical assessment of adverse pregnancy outcome and periodontal disease. *J Clin Periodontol.* 35(8 Suppl):380-97.
- Xiong X, Buekens P, Fraser W, Beck J, Offenbacher S. 2006. Periodontal disease and adverse pregnancy outcomes: a systematic review. *BJOG.* 113(2):135-43.
- Xiong X, Buekens P, Vastardis S, Yu SM. 2007. Periodontal disease and pregnancy outcomes: state-of-the-science. *Obstet Gynecol Surv.* 62(9):605-15.

**Appendix Figure.** MEDLINE search strategy

((((((("Pregnancy"[Mesh] OR pregnan\*) OR gestation\*) OR gravid\*) OR preconception\*) OR conception)) AND (((((((((((((((("Periodontal Diseases"[Mesh:NoExp] OR "Gingival Diseases"[Mesh:NoExp] OR "Gingivitis"[Mesh] OR "Periodontitis"[Mesh] OR "Periodontal Index"[Mesh:NoExp] OR "Oral Health"[Mesh:NoExp])) OR periodontal disease\*) OR gingiv\*) OR gum disease\*) OR "gingival health") OR swollen gum\*) OR "bleeding on probing") OR periodont\*) OR parodont\*) OR paradont\*) OR "periodontal index") OR "oral health") OR "oral disease")) AND (((((((("Review" [Publication Type:NoExp] OR "Meta-Analysis" [Publication Type:NoExp])) OR "systematic review") OR review) OR meta-analy\*) OR metaanaly\*))

**Appendix Table 1.** Data extraction form

**Article ID:**

**Data Extractor:**

**Date:**

| <b>General info of the review</b>                                                   |  |
|-------------------------------------------------------------------------------------|--|
| Citation                                                                            |  |
| Author names and institutions<br><i>(In order of appearance)</i>                    |  |
| Contact information corresponding author                                            |  |
| Classification<br><i>(Systematic review or systematic review and meta-analysis)</i> |  |
| Conflict of interests                                                               |  |
| Funding                                                                             |  |
| Registration details of the review protocol                                         |  |
| Objective/research question (PICO(T))                                               |  |

| <b>Methods applied during the systematic review</b> | <b>Page/Paragraph in article</b> |
|-----------------------------------------------------|----------------------------------|
| Information sources used                            |                                  |
| Search strategy including search periods            |                                  |
| Applied limitations during search                   |                                  |
| Study selection process                             |                                  |
| Eligibility criteria                                |                                  |
| Definition of periodontal disease                   |                                  |
| Outcome(s) for which data was sought                |                                  |
| Definition of                                       |                                  |

|                                                                                                                                            |  |  |
|--------------------------------------------------------------------------------------------------------------------------------------------|--|--|
| outcome(s)                                                                                                                                 |  |  |
| Data collection process                                                                                                                    |  |  |
| List all data extracted from the primary studies                                                                                           |  |  |
| Methods for data synthesis ( <i>meta-analysis</i> )                                                                                        |  |  |
| Methodological details of meta-bias assessment ( <i>e.g. publication bias</i> )                                                            |  |  |
| Methods used for assessing risk of bias of individual studies ( <i>Quality analysis, which tool was used, mean score and score range</i> ) |  |  |

| <b>Results of the systematic review</b>                           |  | <b>Page/Paragraph in article</b> |
|-------------------------------------------------------------------|--|----------------------------------|
| Number and study design of primary studies included in the review |  |                                  |
| Total number of participants included in the review               |  |                                  |
| Study population characteristics                                  |  |                                  |
| Countries where studies have been conducted                       |  |                                  |
| Was risk of bias presented for each included study: yes/no        |  |                                  |
| Was risk of bias across studies presented: yes/no                 |  |                                  |
| Was risk of bias used in data-synthesis: yes/no                   |  |                                  |
| <b>Main Findings</b>                                              |  |                                  |

|                                                            |  |  |
|------------------------------------------------------------|--|--|
| Results of meta-analysis (OR/RR, 95%-CI)                   |  |  |
| Results of subgroup analysis (OR/RR, 95%-CI)               |  |  |
| Brief summary of results if no meta-analysis was performed |  |  |
| Describe results from any additional analyses done         |  |  |
| Results of any meta-bias (e.g. publication bias)           |  |  |

| <i>Discussion of the systematic review</i>     |  | <i>Page/Paragraph in article</i> |
|------------------------------------------------|--|----------------------------------|
| Relevant limitations identified by the authors |  |                                  |
| Overall conclusions of the systematic review   |  |                                  |

|                     |  |
|---------------------|--|
| <b>AMSTAR Score</b> |  |
|---------------------|--|

***Discrepancies between outcomes mentioned in the review protocol and published report of the systematic review***

|  |
|--|
|  |
|--|

**Appendix Table 2.** Overview of excluded studies and reason for exclusion

| First author (year) | Reference                                                                                                                                                                                                                                                                                    | Reason for exclusion                            |
|---------------------|----------------------------------------------------------------------------------------------------------------------------------------------------------------------------------------------------------------------------------------------------------------------------------------------|-------------------------------------------------|
| Polyzos (2010)      | Polyzos NP, Polyzos IP, Zavos A, Valachis A, Mauri D, Papanikolaou EG, Tzioras S, Weber D, and Messinis IE. Obstetric outcomes after treatment of periodontal disease during pregnancy: systematic review and meta-analysis. <i>BMJ</i> . 2010 Dec 29;341:c7017                              | No comparison between woman with and without PD |
| Polyzos (2009)      | Polyzos NP, Polyzos IP, Mauri D, Tzioras S, Tsappi M, Cortinovic I, and Casazza G. Effect of periodontal disease treatment during pregnancy on preterm birth incidence: a metaanalysis of randomized trials (Structured abstract). <i>Am J Obstet and Gynecol</i> . 2009 Mar;200(3): 225-232 | No comparison between woman with and without PD |
| Boutin (2013)       | Boutin A, Demers S, Roberge S, Roy-Morency A, Chandad F, and Bujold E. Treatment of periodontal disease and prevention of preterm birth: systematic review and meta-analysis. <i>Am J Perinatol</i> . 2013 Aug;30(7):537-44                                                                  | No comparison between woman with and without PD |
| Rosa (2012)         | Rosa MI, Pires PD, Medeiros LR, Edelweiss MI, and Martinez-Mesa J. Periodontal disease treatment and risk of preterm birth: a systematic review and meta-analysis. <i>Cad Saude Publica</i> . 2012 Oct;28(10):1823-33.                                                                       | No comparison between woman with and without PD |
| Uppal (2010)        | Uppal A, Uppal S, Pinto A, Dutta M, Shrivatsa S, Dandolu V, and Mupparapu M. The effectiveness of periodontal disease treatment during pregnancy in reducing the risk of experiencing preterm birth and low birth weight: a meta-analysis. <i>J Am Dent Assoc</i> . 2010 Dec;141(12):1423-34 | No comparison between woman with and without PD |
| George (2011)       | George A, Shamim S, Johnson M, Ajwani S, Bhole S, Blinkhorn A, Ellis S, and Andrews K. Periodontal treatment during pregnancy and birth outcomes: a meta-analysis of randomised trials. <i>Int J Evid Based Healthc</i> . 2011 Jun;9(2):122-47.                                              | No comparison between woman with and without PD |
| Kim (2012)          | Kim AJ, Lo AJ, Pullin DA, Thornton-Johnson DS, and Karimbux NY. Scaling and root planing treatment for periodontitis to reduce preterm birth and low birth weight: a systematic review and meta-analysis of randomized controlled trials. <i>J Periodontol</i> . 2012 Dec;83(12):1508-19.    | No comparison between woman with and without PD |
| Shah (2013)         | Shah M, Muley A, and Muley P. Effect of nonsurgical periodontal therapy during gestation period on adverse pregnancy outcome: a systematic review. <i>J Matern Fetal Neonatal Med</i> . 2013 Nov;26(17):1691-5.                                                                              | No comparison between woman with and without PD |
| Michalowicz (2013)  | Michalowicz BS, Gustafsson A, Thumbigere-Math V, and Buhlin K. The effects of periodontal treatment on pregnancy outcomes. <i>J Periodontol</i> . 2013 Apr;84(4                                                                                                                              | Non systematic review                           |

|                    |                                                                                                                                                                                                                                                                                                   |                                                 |
|--------------------|---------------------------------------------------------------------------------------------------------------------------------------------------------------------------------------------------------------------------------------------------------------------------------------------------|-------------------------------------------------|
|                    | Suppl):S195-208                                                                                                                                                                                                                                                                                   |                                                 |
| Fogacci (2011)     | Fogacci MF, Vettore MV, and Thome Leao AT. The effect of periodontal therapy on preterm low birth weight: a meta-analysis. <i>Obstet Gynecol.</i> 2011 Jan;117(1):153-65.                                                                                                                         | No comparison between woman with and without PD |
| Chambrone (2011)   | Chambrone L, Pannuti CM, Guglielmetti MR, and Chambrone LA. Evidence grade associating periodontitis with preterm birth and/or low birth weight: II: a systematic review of randomized trials evaluating the effects of periodontal treatment. <i>J Clin Periodontol.</i> 2011 Oct;38(10):902-14. | No comparison between woman with and without PD |
| Morency (2007)     | Morency AM, and Bujold E. The effect of second-trimester antibiotic therapy on the rate of preterm birth. <i>J Obstet Gynaecol Can.</i> 2007 Jan;29(1):35-44.                                                                                                                                     | No comparison between woman with and without PD |
| Crowther (2005)    | Crowther Caroline A, Thomas N, Middleton P, Chua M-C, and Esposito M. Treating periodontal disease for preventing preterm birth in pregnant women. <i>Cochrane Database of Systematic Reviews.</i> 2005.                                                                                          | No comparison between woman with and without PD |
| Schwendicke (2015) | Schwendicke F, Karimbux N, Allareddy V, and Gluud C. Periodontal treatment for preventing adverse pregnancy outcomes: a meta- and trial sequential analysis. <i>PLoS One.</i> 2015 Jun 2;10(6):e0129060.                                                                                          | No comparison between woman with and without PD |
| Lopez (2015)       | Lopez NJ, Uribe S, and Martinez B. Effect of periodontal treatment on preterm birth rate: a systematic review of meta-analyses. <i>Periodontol 2000.</i> 2015 Feb;67(1):87-130.                                                                                                                   | No comparison between woman with and without PD |
| Stadelmann (2013)  | Stadelmann P, Alessandri R, Eick S, Salvi GE, Surbek D, and Sculean A. The potential association between gingival crevicular fluid inflammatory mediators and adverse pregnancy outcomes: a systematic review. <i>Clin Oral Investig.</i> 2013 Jul;17(6):1453-63.                                 | No comparison between woman with and without PD |
| Shanthi (2012)     | Shanthi V, Vanka A, Bhambal A, Saxena V, Saxena S, and Kumar SS. Association of pregnant women periodontal status to preterm and low-birth weight babies: A systematic and evidence-based review. <i>Dent Res J (Isfahan).</i> 2012 Jul;9(4):368-80.                                              | Non systematic review                           |
| Krejci (2012)      | Krejci CB, and Bissada NF. Women's health: periodontitis and its relation to hormonal changes, adverse pregnancy outcomes and osteoporosis. <i>Oral Health Prev Dent.</i> 2012;10(1): 83-92.                                                                                                      | Full text unobtainable                          |
| Condylis (2013)    | Condylis B, Le Borgne H, Demoersman J, Campard G, Philippe HJ, and Soueidan A. [Interest of periodontitis screening and treatment in pregnancy: systematic review]. <i>J Gynecol Obstet Biol Reprod (Paris).</i> 2013 Oct;42(6):511-7                                                             | No comparison between woman with and without PD |



|                    |                                                                                                                                                                                                                                              |                                                 |
|--------------------|----------------------------------------------------------------------------------------------------------------------------------------------------------------------------------------------------------------------------------------------|-------------------------------------------------|
| Baskaradoss (2012) | Baskaradoss JK, Geevarghese A, and Al Dosari AA. Causes of adverse pregnancy outcomes and the role of maternal periodontal status - a review of the literature. <i>Open Dent J.</i> 2012;6:79-84                                             | Non systematic review                           |
| Azarpazhooh (2012) | Azarpazhooh A, and Tenenbaum HC. Separating fact from fiction: use of high-level evidence from research syntheses to identify diseases and disorders associated with periodontal disease. <i>J Can Dent Assoc.</i> 2012;78:c25               | Non systematic review                           |
| Cetin (2012)       | Cetin I, Pileri P, Villa A, Calabrese S, Ottolenghi L, and Abati S. Pathogenic mechanisms linking periodontal diseases with adverse pregnancy outcomes. <i>Reprod Sci;</i> 2012 Jun;19(6):633-41                                             | Non systematic review                           |
| Horton (2012)      | Horton AL, and Boggess KA. Periodontal disease and preterm birth. <i>Obstet Gynecol Clin North Am.</i> 2012 Mar;39(1):17-23                                                                                                                  | Non systematic review                           |
| Garcia (2011)      | Garcia R. Scaling and root debridement in pregnant women did not result in fewer preterm births. <i>Evid Based Dent.</i> 2011 Dec;12(4):112                                                                                                  | Commentary on systematic review                 |
| Huck (2011)        | Huck O, Tenenbaum H, and Davideau JL. Relationship between periodontal diseases and preterm birth: recent epidemiological and biological data. <i>J Pregnancy.</i> 2011;2011:164654                                                          | Non systematic review                           |
| Africa (2011)      | Africa CW. Oral colonization of Gram-negative anaerobes as a risk factor for preterm delivery. <i>Virulence.</i> 2011 Nov-Dec;2(6):498-508                                                                                                   | Non systematic review                           |
| Baccaglini (2011)  | Baccaglini L. A meta-analysis of randomized controlled trials shows no evidence that periodontal treatment during pregnancy prevents adverse pregnancy outcomes. <i>J Am Dent Assoc.</i> 2011 Oct;142(10):1192-3                             | Commentary on systematic review                 |
| Xiong (2011)       | Xiong X, Buekens P, Goldenberg RL, Offenbacher S, and Qian X. Optimal timing of periodontal disease treatment for prevention of adverse pregnancy outcomes: before or during pregnancy? <i>Am J Obstet Gynecol.</i> 2011 Aug;205(2):111.e1-6 | Non systematic review                           |
| Sanu (2011)        | Sanu O, and Lamont RF. Periodontal disease and bacterial vaginosis as genetic and environmental markers for the risk of spontaneous preterm labor and preterm birth. <i>J Matern Fetal Neonatal Med.</i> 2011 Dec;24(12):1476-85             | Non systematic review                           |
| Fogacci (2011)     | Fogacci MF, Vettore MV, and Leao AT. The effect of periodontal therapy on preterm low birth weight: a meta-analysis. <i>Obstet Gynecol.</i> 2011 Jan;117(1):153-65                                                                           | No comparison between woman with and without PD |
| Matevosyan (2011)  | Matevosyan NR. Periodontal disease and perinatal outcomes. <i>Arch Gynecol Obstet.</i> 2011 Apr;283(4):675-86                                                                                                                                | No comprehensive search performed               |
| Pimentel (2010)    | Pimentel Lopes De Oliveira GJ, Amaral Fontanari L, Chaves De Souza JA, Ribeiro Costa M, and Cirelli JA. Effect of periodontal treatment on the                                                                                               | No comparison between woman with and without PD |

|                    |                                                                                                                                                                                                                                      |                                                                                        |
|--------------------|--------------------------------------------------------------------------------------------------------------------------------------------------------------------------------------------------------------------------------------|----------------------------------------------------------------------------------------|
|                    | incidence of preterm delivery: a systematic review. <i>Minerva Stomatol.</i> 2010 Oct;59(10):543-50                                                                                                                                  |                                                                                        |
| Ramchandani (2010) | Ramchandani M, Siddiqui M, Kanwar R, Lakha M, Phi L, Giacomelli L, and Chiappelli F. Proteomic signature of periodontal disease in pregnancy: Predictive validity for adverse outcomes. <i>Bioinformation.</i> 2010 Jan 6;5(7):300-3 | Systematic review of systematic reviews reporting on PD and adverse pregnancy outcomes |
| Mayer (2008)       | Mayer Y, Levin L, Oettinger-Barak O, and Machtei E. [Pregnancy and periodontal disease--is there a relation?]. <i>Refuat Hapeh Vehashinayim</i> (1993). 2008. Jan;25(1):24-33                                                        | Non systematic review                                                                  |
| Vergnes (2008)     | Vergnes JN. Studies suggest an association between maternal periodontal disease and pre-eclampsia. <i>Evid Based Dent.</i> 2008;9(2):46-7                                                                                            | Commentary on systematic review                                                        |
| Sacco (2008)       | Sacco G, Carmagnola D, Abati S, Luglio PF, Ottolenghi L, Villa A, Maida C, and Campus G. Periodontal disease and preterm birth relationship: a review of the literature. <i>Minerva Stomatol.</i> 2008 May; 57(5):233-50             | Non systematic review                                                                  |
| Dasanayake (2008)  | Dasanayake AP, Gennaro S, Hendricks-Munoz KD, and Chhun N. Maternal periodontal disease, pregnancy, and neonatal outcomes <i>MCN Am J Matern Child Nurs.</i> 2008 Jan-Feb;33(1):45-9                                                 | Non systematic review                                                                  |
| Michalowicz (2007) | Michalowicz BS, and Durand R. Maternal periodontal disease and spontaneous preterm birth. <i>Periodontol</i> 2000. 2007;44:103-12                                                                                                    | Non systematic review                                                                  |
| Clothier (2007)    | Clothier B, Stringer M, and Jeffcoat MK. Periodontal disease and pregnancy outcomes: exposure, risk and intervention. <i>Best Pract Res Clin Obstet Gynaecol.</i> 2007 Jun;21(3):451-66                                              | Non systematic review                                                                  |
| Nugent (2006)      | Nugent JL, and Baker PN. Periodontal disease and adverse pregnancy outcomes: a systematic review. <i>BJOG.</i> 2006 Jul;113(7):848;author reply 848-9                                                                                | Correspondent article                                                                  |
| Qureshi (2005)     | Qureshi A, Ijaz S, Syed A, and Khan AA. Periodontal infection: a potential risk factor for pre-term delivery of low birth weight (PLBW) babies. <i>J Pak Med Assoc.</i> 2005 Oct;55(10):448-52                                       | Non systematic review                                                                  |
| Pizzo (2005)       | Pizzo G, La Cara M, Conti Nibali M, and Guiglia R. Periodontitis and preterm delivery. A review of the literature. <i>Minerva Stomatol.</i> 2005 Jan-Feb;54(1-2):1-14                                                                | Non systematic review                                                                  |
| Yeo (2005)         | Yeo BK, Lim LP, Paquette DW, and Williams RC. Periodontal disease -- the emergence of a risk for systemic conditions: pre-term low birth weight. <i>Ann Acad Med Singapore.</i> 2005 Jan;34(1):111-6                                 | Non systematic review                                                                  |
| Offenbacher (2004) | Offenbacher S. Maternal periodontal infections, prematurity, and growth restriction. <i>Clin Obstet Gynecol.</i> 2004 Dec;47(4):808-21;discussion 881-2                                                                              | Non systematic review                                                                  |

|                    |                                                                                                                                                                                                                                                             |                                                 |
|--------------------|-------------------------------------------------------------------------------------------------------------------------------------------------------------------------------------------------------------------------------------------------------------|-------------------------------------------------|
| Konopka (2004)     | Konopka T. [Periodontitis and preterm low birth weight]. <i>Ginekol Pol.</i> 2004 May;75(5):397-403                                                                                                                                                         | Non systematic review                           |
| Radnai (2002)      | Radnai M, and Gorzo I. [Periodontal disease as a potential risk factor for preterm birth and low birth weight (Literature review)]. <i>Fogorv Sz.</i> 2002 Dec;95(6):241-4                                                                                  | Non systematic review                           |
| Dasanayake (2003)  | Dasanayake AP, Russell S, Boyd D, Madianos PN, Forster T, and Hill E. Preterm low birth weight and periodontal disease among African Americans. <i>Dent Clin North Am.</i> 2003 Jan;47(1):115-25, x-xi                                                      | Non systematic review                           |
| Jeffcoat (2001)    | Jeffcoat MK, Geurs NC, Reddy MS, Goldenberg RL, and Hauth JC. Current evidence regarding periodontal disease as a risk factor in preterm birth. <i>Ann Periodontol.</i> 2001 Dec;6(1):183-8                                                                 | Non systematic review                           |
| Zachariasen (1998) | Zachariasen RD, and Dennison DK. Periodontal disease and preterm low birth weight deliveries. <i>J Gt Houst Dent Soc.</i> 1998 Nov;70(4):16-9                                                                                                               | Non systematic review                           |
| Offenbacher (1998) | Offenbacher S, Beck JD, Lief S, and Slade G. Role of periodontitis in systemic health: spontaneous preterm birth. <i>J Dent Educ.</i> 1998 Oct;62(10):852-8                                                                                                 | Non systematic review                           |
| Misrath (2014)     | Misrath Banu MA, and Ramamurthy J. Periodontitis a risk factor for pre-eclampsia in pregnant women. <i>Int J Pharm Bio Sci.</i> 2014;5(2):B736-B739                                                                                                         | Non systematic review                           |
| Patil (2013)       | Patil RB, and Shettar SS. Oral health considerations in pregnant women- A review. <i>Indian J Public Health.</i> 2013;4(2):199-202                                                                                                                          | Non systematic review                           |
| Rosa (2012)        | da Rosa MI, Pires PDS, Medeiros LR, Edelweiss MI, and Martinez-Mesa J. Periodontal disease treatment and risk of preterm birth: A systematic review and meta-analysis. <i>Cad Saude Publica.</i> 2012;28(10): 1823-1833                                     | No comparison between woman with and without PD |
| Polyzos (2011)     | Polyzos NP, Polyzos IP, Zavos A, Valachis A, Mauri D, Papanikolaou EG, Tzioras S, Weber D, and Messinis IE. Obstetric outcomes after treatment of periodontal disease during pregnancy: Systematic review and meta-analysis. <i>BMJ.</i> 2011;342(7788): 91 | No comparison between woman with and without PD |
| Macones (2011)     | Macones G. Treatment of periodontal disease in pregnancy. <i>BMJ.</i> 2011;342(7788): 59                                                                                                                                                                    | Editorial                                       |
| Pires (2012)       | Pires PS, Medeiros LR, Simoes PW, Silva NC, Silva BR, Silva FR, Lumertz S, Cesconetto S, Fernandes B, and Rosa MI. Periodontal therapy and risk of preterm birth: A systematic review and meta-analysis. <i>Int J Gynaecol Obstet.</i> 2012;119:S747        | Summary of systematic review                    |
| Corbella (2012)    | Corbella S, Del Fabbro M, Taschieri S, and Francetti L. Periodontal disease and adverse pregnancy outcomes: A systematic review. <i>Italian Oral Surgery.</i> 2012;11(4):132-146                                                                            | Summary of systematic review                    |

|                      |                                                                                                                                                                                                                                                           |                              |
|----------------------|-----------------------------------------------------------------------------------------------------------------------------------------------------------------------------------------------------------------------------------------------------------|------------------------------|
| Abrahamowicz (2012)  | Abrahamowicz W, DarmochwallKolarz D, Gonet-Sebastianka J, Hus I, and Oleszczuk J. Adverse outcome of pregnancy in the presence of periodontal disease. <i>Ginekologia i Poloznictwo</i> . 2012;23(1):63-69                                                | Non systematic review        |
| Han (2011)           | Han YW. Can oral bacteria cause pregnancy complications? <i>Women's Health</i> . 2011;7(4):401-404                                                                                                                                                        | Non systematic review        |
| Avula (2011)         | Avula H, and Avula J. Periodontal infections and adverse pregnancy outcomes: The oral health-fetal connection. <i>J Gynecol Surg</i> . 2011;27(1): 1-4                                                                                                    | Non systematic review        |
| Gilbert (2009)       | Gilbert E, Wahlquist AH. Treatment of periodontal disease in pregnancy reduces preterm birth? <i>J Natl Med Assoc</i> . 2009;101(7):740-741                                                                                                               | Non systematic review        |
| Conde-Agudelo (2009) | Conde-Agudelo A, and Romero R. Maternal periodontal disease and risk of preeclampsia: A systematic review and meta-analysis. <i>Am J Obstet and Gynecol</i> . 2009: S285                                                                                  | Summary of systematic review |
| Kiczynska (1999)     | Kiczynska M, Oleszczuk AK, Oleszczuk JJ, Slusarski P, and Keith LG. Prevention and treatment of periodontal diseases in pregnancy: A review of recent and conflicting literature. <i>Int J Fertil Womens Med</i> . 2008;53(5):170-175                     | Non systematic review        |
| Shennan (2006)       | Periodontal disease and adverse pregnancy outcomes: A systematic review – Commentary. <i>Obstet Gynecol Surv</i> . 2006;61(5):307-309                                                                                                                     | Editorial                    |
| Rodriguez (2004)     | Rodriguez Nunez I, Lopez Castro G, Leyes Borrajo JL, Garcia Varela L, and Gallas Torreira M. Periodontal disease and its potential repercussion on the risk of prematurity [Spanish]. <i>Rev Esp Pediatr</i> . 2004;60(4):303-306                         | Non systematic review        |
| Khan (2007)          | Khan SN, Ahmad OK, and Almas K. Maternal periodontal disease and preterm low birth weight: an update. <i>Pakistan Oral and Dental Journal</i> . 2007;27(2):155-162                                                                                        | Non systematic review        |
| Santos (2014)        | Santos EB, Santos MSd, Bernhard VR, Vargas PRMd, Avila-Campos MJ, Chiarelli FM, and Feitosa ACR. Periodontopathogens and risks of pregnancy complications. A review of the literature. <i>Perionews</i> . 2014;8(3): 243-248                              | Full text unobtainable       |
| Passini (2007)       | Passini JEnior R, Nomura ML, and Politano GT? Periodontal disease and obstetrical complications: is there a risk relationship? <i>Rev bras ginecol obstet</i> . 2007;29(7): 370-375                                                                       | Non systematic review        |
| Cerqueira (2012)     | Cerqueira FL, Barbosa VS, and Rios MdA. Maternal periodontal disease and risk for preeclampsia: literature review. <i>Perionews</i> . 2012;6(4):393-398                                                                                                   | Non systematic review        |
| Domingues (2010)     | Domingues JdM, Oliveira LCBSd, Alves J, and Machado W. Periodontal disease as a possible risk factor contributing, among other classic risk factors for preterm birth and / or low birth weight: literature review. <i>Periodontia</i> . 2010;20(2):33-38 | Non systematic review        |

|                     |                                                                                                                                                                                                                                                                                                   |                        |
|---------------------|---------------------------------------------------------------------------------------------------------------------------------------------------------------------------------------------------------------------------------------------------------------------------------------------------|------------------------|
| Londono (2009)      | Londoño AM, Salcedo AM, Silva IC, Vera L, and Cruz C. Periodontal disease and preeclampsia: literature review. <i>Rev Estomat.</i> 2009;17(1):38-44                                                                                                                                               | Non systematic review  |
| Costa (2012)        | Costa LCM, Amormino SAF, Albuquerque BN, Cota LOM, Costa JEd, and Costa FO. Periodontal disease and adverse pregnancy outcomes: a critical review. <i>Perionews.</i> 2012;6(1):61-65                                                                                                              | Full text unobtainable |
| Alves (2007)        | Alves RT, Ribeiro RA, and Costa LRdRSd. Association between periodontal disease in pregnant women and preterm and/or low weight births: a review study. <i>HU rev.</i> 2007;33(1):29-36                                                                                                           | Non systematic review  |
| Michalowicz (2009)  | Michalowicz BS, Novak MJ, Hodges JS, DiAngelis A, Buchanan W, Papapanou PN, Mitchell DA, Ferguson JE, Lupo V, and Bofill J. Serum inflammatory mediators in pregnancy: changes after periodontal treatment and association with pregnancy outcomes<br><i>J Periodontal.</i> 2009;80(11):1731-1741 | Non systematic review  |
| Madianos (2013)     | Madianos PN, Bobetsis YA, and Offenbacher S. Adverse pregnancy outcomes (APOs) and periodontal disease: pathogenic mechanisms<br><i>J Clin Periodontal.</i> 2013;40(s14):S170-S180                                                                                                                | Non systematic review  |
| Vettore (2008)      | Vettore M, Leão A, da Silva AM, Lamarca G, and Sheiham A. The relationship between periodontitis and preterm low birthweight<br><i>J Dent Res.</i> 2008;87(1):73-78                                                                                                                               | Non systematic review  |
| Kumar (2013)        | Kumar A, Basra M, Begum N, Rani V, Prasad S, Lamba AK, Verma M, Agarwal S, and Sharma S. Association of maternal periodontal health with adverse pregnancy outcome. <i>J Obstet Gynaecol Res.</i> 2013;39(1):40-45                                                                                | Non systematic review  |
| Lohsoonthorn (2009) | Lohsoonthorn V, Kungsadalpipob K, Chanchareonsook P, Limpongsanurak S, Vanichjakvong O, Sutdhibhisal S, Wongkittikraiwan N, Sookprome C, Kamolpornwijit W, Jantarasaengaram S. Is maternal periodontal disease a risk factor for preterm delivery? <i>Am J Epidemiol.</i> 2009;169(6):731-739     | Non systematic review  |
| Baskaradoss (2012)  | Baskaradoss JK, Geevarghese A, and Al Dosari AAF. Causes of adverse pregnancy outcomes and the role of maternal periodontal status—a review of the literature. <i>Open Dent J.</i> 2012;6:79-84                                                                                                   | Non systematic review  |
| Horton (2010)       | Horton AL, Boggess KA, Moss KL, Beck J, and Offenbacher S. Periodontal disease, oxidative stress, and risk for preeclampsia. <i>J Periodontol.</i> 2010;81(2):199-204                                                                                                                             | Non systematic review  |
| Michalowicz (2007)  | Michalowicz BS, Hodges JS, Novak MJ, Buchanan W, DiAngelis AJ, Papapanou PN, Mitchell DA, Ferguson JE, Lupo VR, and Bofill J. Change in periodontitis during pregnancy and the risk of pre - term birth and low                                                                                   | Non systematic review  |

|                     |                                                                                                                                                                                                                                                               |                                                                                        |
|---------------------|---------------------------------------------------------------------------------------------------------------------------------------------------------------------------------------------------------------------------------------------------------------|----------------------------------------------------------------------------------------|
|                     | birthweight. Journal Clin Periodontol. 2009;36(4):308-314                                                                                                                                                                                                     |                                                                                        |
| Offenbacher (2007)  | Has periodontal treatment failed to reduce adverse pregnancy outcomes? The answer may be premature. J Periodontol. 2007;78(2):195-197                                                                                                                         | Non systematic review                                                                  |
| Lopez (2005)        | López R. Periodontal disease, preterm birth and low birthweight. Evidence-based dentistry. 2005;6(4):90-91                                                                                                                                                    | Commentary on systematic review                                                        |
| Jared (2008)        | Jared H, and Boggess KA. Periodontal diseases and adverse pregnancy outcomes: A review of the evidence and implications for clinical practice. American Dental Hygienists Association. 2008;82(suppl 1):24-24                                                 | Non systematic review                                                                  |
| Marakoglu (2008)    | Marakoglu I, Gursoy UK, Marakoglu K, Cakmak H, and Ataoglu T. Periodontitis as a risk factor for preterm low birth weight<br>Yonsei medical journal. 2008;49(2):200-203                                                                                       | Non systematic review                                                                  |
| Chandrapooja (2016) | Chandrapooja J, Gayathri R, Vishnupriya V. Oral health during pregnancy-a systematic review. J Phar Sci Res. 2016;8(8):841-843                                                                                                                                | Non systematic review                                                                  |
| Esteves (2016)      | Esteves Lima RP, Cyrino RM, de Carvalho Dutra B, Oliveira da Silveira J, Martins CC, Miranda Cota LO, Costa FO. Association Between Periodontitis and Gestational Diabetes Mellitus: Systematic Review and Meta-Analysis. J Periodontol. 2016 Jan;87(1):48-57 | No results of interest                                                                 |
| Jiang (2016)        | Jiang H, Xiong X. Periodontitis may be Associated with Gestational Diabetes Mellitus but not Affirmatively. J Evid Based Dent Pract. 2016 Jun;16(2):121-3                                                                                                     | Commentary on systematic review                                                        |
| Jingfei (2015)      | Jingfei Zhang, Shasha Yu, Shengping Chen, Weiyuan Zhang. Meta-analysis of association between periodontal disease and preeclampsia. Chinese Journal of Perinatal Medicine. 2015;18(6):430-436                                                                 | No comparison between woman with and without PD                                        |
| Linden (2013)       | Linden GJ, Gerard J, Lyons A, Scannapieco FA. Periodontal systemic associations: review of the evidence. J Clin Periodontol. 2013;40: s14                                                                                                                     | No results of interest                                                                 |
| Vamos (2015)        | Vamos CA, Thompson EL, Avendano M, Daley EM, Quinonez RB, Boggess K. Oral health promotion interventions during pregnancy: a systematic review. Community Dent Oral Epidemiol. 2015;43(5):385-396                                                             | No comparison between woman with and without PD                                        |
| Ha (2016)           | Ha JA. Association between periodontitis and preterm birth and low birth weight. Journal of Korean society of Dental Hygiene. 2016;16(2):155-163                                                                                                              | Non systematic review                                                                  |
| Maboudi (2016)      | Maboudi A, Shabnam M. Preeclampsia and Periodontal Diseases: A Review Study. Journal of Mazandaran University of Medical Sciences . 2016;26(137): 224-234.                                                                                                    | Systematic review of systematic reviews reporting on PD and adverse pregnancy outcomes |

**ABBREVIATIONS**

PD – Periodontal disease

**Appendix Table 3.** Overall citation matrix table

| Primary included study<br>(first author, year) | Study classification | Country where study is conducted | Chambrone 2011 | Conde-Agudelo 2008 | Corbella 2012a | Corbella 2012b | Corbella 2016 | Huang 2014 | Ide 2013 | Khader 2005 | Konopka 2012 | Kunnen 2010 | Madianos 2002 | Oliveira 2009 | Rustveld 2008 | Sanchez 2004 | Scannapieco 2003 | Sgolastra 2013 | Teshome 2016 | Vergnes 2007 | Vettore 2006 | Wei 2013 | Wimmer 2008 | Xiong 2006 | Xiong 2007 |   |
|------------------------------------------------|----------------------|----------------------------------|----------------|--------------------|----------------|----------------|---------------|------------|----------|-------------|--------------|-------------|---------------|---------------|---------------|--------------|------------------|----------------|--------------|--------------|--------------|----------|-------------|------------|------------|---|
| Abati 2013                                     | Cohort               | Italy                            |                |                    |                |                | x             |            |          |             |              |             |               |               |               |              |                  |                |              |              |              |          |             |            |            |   |
| Agueda 2008                                    | Cohort               | Spain                            | x              |                    | x              | x              | x             |            | x        |             | x            |             |               |               |               |              |                  |                |              |              |              |          |             | x          |            |   |
| Ahmed Haerian 2013                             | CC                   | Iran                             |                |                    |                |                |               |            |          |             |              |             |               |               |               |              |                  |                | x            |              |              |          |             |            |            |   |
| AlHabashneh 2012                               | Cohort               | Jordan                           |                |                    |                |                |               |            | x        |             |              |             |               |               |               |              |                  |                |              |              |              |          |             |            |            |   |
| Ali 2012                                       | Cohort               | Malaysia                         |                |                    |                |                | x             |            |          |             |              |             |               |               |               |              |                  |                |              |              |              |          |             |            |            |   |
| Alves 2006                                     | CC                   | Brazil                           |                |                    |                |                |               |            |          |             |              |             |               |               |               |              |                  |                |              |              |              |          |             | x          |            |   |
| Arteaga-Guerra 2010                            | Cohort               | Columbia                         |                |                    |                |                |               |            |          |             | x            |             |               |               |               |              |                  |                |              |              |              |          |             |            |            |   |
| Barak 2007                                     | CC                   | Israel                           |                | x                  |                |                |               |            |          |             |              |             |               |               |               |              |                  |                |              |              |              |          |             |            |            |   |
| Bassani 2007                                   | CC                   | Brazil                           |                |                    |                |                |               |            | x        |             | x            |             |               | x             |               |              |                  |                |              |              |              |          |             | x          |            | x |
| Betleja 2004                                   | CC                   | Poland                           |                |                    |                |                |               |            |          |             | x            |             |               |               |               |              |                  |                |              |              |              |          |             |            |            |   |
| Bogges 2003                                    | Cohort               | USA                              |                | x                  |                |                |               | x          |          |             |              | x           |               |               | x             |              |                  | x              |              |              |              | x        |             | x          | x          | x |
| Bogges 2006                                    | Cohort               | USA                              |                |                    |                |                |               |            | x        |             |              |             |               |               |               |              |                  |                |              |              |              |          |             | x          |            | x |
| Bosnjak 2006                                   | CC                   | Croatia                          |                |                    |                |                |               |            | x        |             | x            |             |               | x             |               |              |                  |                |              |              |              |          |             | x          |            | x |
| Buduneli 2005                                  | CC                   | Turkey                           |                |                    |                |                |               |            |          |             |              |             |               |               |               |              |                  |                |              |              | x            |          | x           | x          | x          | x |

|                              |        |           |  |   |   |   |   |   |   |  |  |   |   |  |   |   |   |  |   |   |   |   |
|------------------------------|--------|-----------|--|---|---|---|---|---|---|--|--|---|---|--|---|---|---|--|---|---|---|---|
| Canakci 2004                 | CC     | Turkey    |  | x |   |   |   | x | x |  |  | x |   |  | x |   |   |  | x |   | x | x |
| Canakci 2007                 | CC     | Turkey    |  |   |   |   |   |   |   |  |  | x |   |  |   |   |   |  | x |   |   |   |
| Cardoso 1999                 | CC     | Brazil    |  |   |   |   |   |   |   |  |  |   |   |  |   |   |   |  | x |   |   |   |
| Carta 2004                   | CC     | Italy     |  |   |   |   |   |   |   |  |  |   |   |  |   |   |   |  | x |   |   |   |
| Castaldi 2006                | Cohort | Argentina |  | x |   |   |   |   |   |  |  | x |   |  |   |   |   |  |   | x |   | x |
| Chaparro 2012                | CC     | Chile     |  |   |   |   |   |   |   |  |  |   |   |  |   | x |   |  |   |   |   |   |
| Cisse 2015                   | CC     | Senegal   |  |   |   |   |   |   |   |  |  |   |   |  |   |   | x |  |   |   |   |   |
| Contreras 2006               | CC     | Colombia  |  | x |   |   |   | x | x |  |  | x |   |  |   |   |   |  |   | x |   | x |
| Cota 2006                    | CC     | Brazil    |  | x |   |   |   |   | x |  |  |   |   |  |   |   |   |  |   | x |   |   |
| Cruz 2005                    | CC     | Brazil    |  |   |   |   |   |   |   |  |  |   |   |  |   |   | x |  |   | x |   | x |
| Cruz 2009                    | CC     | Brazil    |  |   |   | x | x |   | x |  |  |   |   |  |   |   |   |  |   |   |   |   |
| Da Silva 2012                | CC     | Brazil    |  |   |   |   |   |   |   |  |  |   |   |  |   |   |   |  |   | x |   |   |
| Dasanayake 1998              | CC     | USA       |  |   |   |   |   |   |   |  |  | x | x |  |   |   |   |  |   | x |   | x |
| Dasanayake 2001              | CC     | USA       |  |   |   |   |   |   |   |  |  |   |   |  |   |   |   |  |   | x |   | x |
| Davenport 1998               | CC     | UK        |  |   |   |   |   |   |   |  |  |   |   |  |   |   |   |  |   |   |   |   |
| Davenport 2002               | CC     | UK        |  |   |   |   |   |   |   |  |  |   |   |  |   |   |   |  |   | x |   | x |
| Dortbudak 2005               | Cohort | Austria   |  |   | x |   |   |   |   |  |  |   |   |  |   |   |   |  |   | x | x | x |
| Ercan 2012                   | Cohort | Turkey    |  |   |   |   |   |   |   |  |  |   |   |  |   |   |   |  |   |   |   |   |
| Farrell 2006                 | Cohort | UK        |  |   |   |   |   |   |   |  |  |   |   |  |   |   |   |  |   |   |   | x |
| Fraser<br>(unpublished data) | CC     | Canada    |  |   |   |   |   |   |   |  |  |   |   |  |   |   |   |  |   |   |   | x |
| Gazolla 2007                 | Cohort | Brazil    |  |   |   |   |   |   |   |  |  |   |   |  |   |   |   |  |   |   |   | x |
| Gianella 2011                | CC     | Italy     |  |   |   |   |   |   |   |  |  |   |   |  |   |   |   |  |   |   |   |   |
| Glesse 2004                  | CC     | Brazil    |  |   |   |   |   |   |   |  |  |   |   |  |   |   |   |  |   |   |   | x |
| Goepfert 2004                | CC     | USA       |  |   | x | x | x |   |   |  |  |   |   |  |   |   |   |  |   |   |   | x |
| Gomes Filho 2006             | CC     | Brazil    |  |   |   |   |   |   |   |  |  |   |   |  |   |   |   |  |   |   |   | x |
| Gomes-Filho 2007             | CC     | Brazil    |  |   |   |   |   |   |   |  |  |   |   |  |   |   |   |  |   |   |   | x |
| Grandi 2010                  | CC     | Argentina |  |   |   |   |   |   |   |  |  |   |   |  |   |   |   |  |   |   |   | x |





|                      |        |              |   |  |   |   |   |  |   |   |  |  |   |   |  |   |  |  |   |   |   |   |   |   |   |   |   |  |
|----------------------|--------|--------------|---|--|---|---|---|--|---|---|--|--|---|---|--|---|--|--|---|---|---|---|---|---|---|---|---|--|
| Marin 2005           | CS     | Brazil       |   |  |   | x | x |  | x |   |  |  |   |   |  |   |  |  | x | x |   | x |   |   |   |   |   |  |
| Meurman 2006         | Cohort | Finland      |   |  |   |   |   |  |   |   |  |  |   |   |  |   |  |  |   |   |   | x |   |   |   |   |   |  |
| Mitchell-Lewis 2001  | Cohort | USA          |   |  |   |   |   |  | x |   |  |  | x | x |  | x |  |  |   |   | x |   | x |   |   |   |   |  |
| Mobeen 2008          | Cohort | Pakistan     |   |  | x |   |   |  |   |   |  |  |   |   |  |   |  |  |   |   |   |   |   |   |   |   |   |  |
| Mokeem 2004          | CC     | Saudi-Arabia |   |  |   |   |   |  |   |   |  |  |   |   |  |   |  |  |   |   | x | x |   | x | x | x |   |  |
| Moliterno 2005       | CC     | Brazil       |   |  |   |   |   |  |   |   |  |  | x |   |  |   |  |  |   |   | x | x | x |   | x | x |   |  |
| Moore 2004a          | Cohort | UK           | x |  | x |   |   |  | x |   |  |  | x |   |  |   |  |  |   |   |   | x | x |   | x | x | x |  |
| Moore 2004b          | CC     | UK           |   |  |   |   |   |  |   |   |  |  |   |   |  |   |  |  |   |   |   |   |   |   |   |   |   |  |
| Moore 2005           | CC     | UK           |   |  | x |   |   |  | x |   |  |  |   |   |  |   |  |  |   |   |   |   |   |   |   |   |   |  |
| Moreu 2005           | Cohort | Spain        |   |  |   |   |   |  |   |   |  |  |   |   |  |   |  |  |   |   |   |   |   |   |   |   |   |  |
| Moura da Silva 2012  | CC     | Brazil       |   |  |   |   |   |  |   |   |  |  |   |   |  |   |  |  |   |   |   |   |   |   |   |   |   |  |
| Mumghamba 2007       | CC     | Tanzania     |   |  |   |   |   |  |   |   |  |  |   |   |  |   |  |  |   |   |   |   |   |   |   |   |   |  |
| Nabet 2010           | CC     | France       |   |  |   |   |   |  | x | x |  |  |   |   |  |   |  |  |   |   |   |   |   |   |   |   |   |  |
| Noack 2005           | CC     | Germany      |   |  |   |   |   |  |   |   |  |  |   |   |  |   |  |  |   |   |   |   |   |   |   |   |   |  |
| Oettinger-Barak 2005 | CC     | Israel       |   |  | x |   |   |  |   |   |  |  |   |   |  |   |  |  |   |   |   |   |   |   |   |   |   |  |
| Offenbacher 1996     | CC     | USA          |   |  | x |   |   |  |   |   |  |  |   |   |  |   |  |  |   |   |   |   |   |   |   |   |   |  |
| Offenbacher 1998     | CC     | USA          |   |  |   |   |   |  |   |   |  |  |   |   |  |   |  |  |   |   |   |   |   |   |   |   |   |  |
| Offenbacher 2001     | Cohort | USA          | x |  | x |   |   |  |   |   |  |  |   |   |  |   |  |  |   |   |   |   |   |   |   |   |   |  |
| Offenbacher 2006     | Cohort | USA          | x |  |   |   |   |  |   |   |  |  |   |   |  |   |  |  |   |   |   |   |   |   |   |   |   |  |
| Oittinen 2005        | Cohort | Finland      |   |  |   |   |   |  |   |   |  |  |   |   |  |   |  |  |   |   |   |   |   |   |   |   |   |  |
| Piscoya 2012         | CC     | Brazil       |   |  |   |   |   |  |   |   |  |  |   |   |  |   |  |  |   |   |   |   |   |   |   |   |   |  |
| Pitiphat 2008        | Cohort | USA          | x |  | x |   |   |  |   |   |  |  |   |   |  |   |  |  |   |   |   |   |   |   |   |   |   |  |
| Politano 2011        | CC     | Brazil       |   |  |   |   |   |  |   |   |  |  |   |   |  |   |  |  |   |   |   |   |   |   |   |   |   |  |
| Radnai 2004          | CC     | Hungary      |   |  | x | x | x |  |   |   |  |  |   |   |  |   |  |  |   |   |   |   |   |   |   |   |   |  |
| Radnai 2006          | CC     | Hungary      |   |  | x | x | x |  | x |   |  |  |   |   |  |   |  |  |   |   |   |   |   |   |   |   |   |  |
| Rajapakse 2004       | Cohort | Sri Lanka    |   |  | x |   |   |  |   |   |  |  |   |   |  |   |  |  |   |   |   |   |   |   |   |   |   |  |
| Rajapakse 2005       | Cohort | Sri Lanka    | x |  |   |   |   |  |   |   |  |  |   |   |  |   |  |  |   |   |   |   |   |   |   |   |   |  |
| Rakoto-Alson 2010    | Cohort | Madagascar   | x |  |   |   |   |  |   |   |  |  |   |   |  |   |  |  |   |   |   |   |   |   |   |   |   |  |



**Appendix Table 4.** Assessment of risk of bias of the included systematic reviews (AMSTAR checklist)

| AUTHOR (YEAR)        | 'A PRIORI' DESIGN PROVIDED? (Y/N) | DUPLICATE STUDY SELECTION AND DATA EXTRACTION? (Y/N) | COMPREHENSIVE LITERATURE SEARCH PERFORMED? (Y/N) | STATUS OF PUBLICATION USED AS AN INCLUSION CRITERION? (Y/N) | LIST OF STUDIES (INCLUDED AND EXCLUDED) PROVIDED? (Y/N) | CHARACTERISTICS OF THE INCLUDED STUDIES PROVIDED? (Y/N) | SCIENTIFIC QUALITY OF THE INCLUDED STUDIES ASSESSED AND DOCUMENTED? (Y/N) | SCIENTIFIC QUALITY OF THE INCLUDED STUDIES USED APPROPRIATELY IN FORMULATING CONCLUSIONS? (Y/N) | METHODS USED TO COMBINE THE FINDINGS OF STUDIES APPROPRIATE? (Y/N) | LIKELIHOOD OF PUBLICATION BIAS ASSESSED? (Y/N) | CONFLICT OF INTEREST INCLUDED? (Y/N) | TOTAL SCORE |
|----------------------|-----------------------------------|------------------------------------------------------|--------------------------------------------------|-------------------------------------------------------------|---------------------------------------------------------|---------------------------------------------------------|---------------------------------------------------------------------------|-------------------------------------------------------------------------------------------------|--------------------------------------------------------------------|------------------------------------------------|--------------------------------------|-------------|
| Chambrone (2011)     | N                                 | Y                                                    | Y                                                | Y                                                           | N                                                       | Y                                                       | Y                                                                         | Y                                                                                               | Y                                                                  | N                                              | N                                    | 7           |
| Conde-Agudelo (2008) | N                                 | N                                                    | Y                                                | Y                                                           | N                                                       | Y                                                       | Y                                                                         | Y                                                                                               | Y                                                                  | Y                                              | N                                    | 7           |
| Corbella (2012a)     | N                                 | N                                                    | N                                                | Y                                                           | N                                                       | Y                                                       | N                                                                         | N                                                                                               | N                                                                  | N                                              | N                                    | 2           |
| Corbella (2012b)     | N                                 | Y                                                    | N                                                | Y                                                           | Y                                                       | Y                                                       | N                                                                         | N                                                                                               | Y                                                                  | Y                                              | N                                    | 6           |
| Corbella (2016)      | N                                 | Y                                                    | Y                                                | Y                                                           | Y                                                       | Y                                                       | Y                                                                         | Y                                                                                               | Y                                                                  | N                                              | N                                    | 8           |
| Huang (2014)         | N                                 | N                                                    | N                                                | Y                                                           | N                                                       | Y                                                       | Y                                                                         | Y                                                                                               | Y                                                                  | Y                                              | N                                    | 6           |
| Ide (2013)           | N                                 | Y                                                    | Y                                                | Y                                                           | N                                                       | Y                                                       | Y                                                                         | Y                                                                                               | N                                                                  | N                                              | N                                    | 6           |
| Khader (2005)        | N                                 | Y                                                    | N                                                | Y                                                           | N                                                       | Y                                                       | Y                                                                         | Y                                                                                               | Y                                                                  | Y                                              | N                                    | 7           |
| Konopka (2012)       | N                                 | N                                                    | N                                                | Y                                                           | N                                                       | Y                                                       | Y                                                                         | Y                                                                                               | Y                                                                  | Y                                              | N                                    | 6           |
| Kunnen (2010)        | N                                 | Y                                                    | N                                                | Y                                                           | Y                                                       | Y                                                       | Y                                                                         | Y                                                                                               | Y                                                                  | N                                              | N                                    | 7           |
| Madianos (2002)      | N                                 | N                                                    | Y                                                | Y                                                           | N                                                       | Y                                                       | N                                                                         | N                                                                                               | Y                                                                  | N                                              | N                                    | 4           |
| Oliveira (2009)      | N                                 | N                                                    | N                                                | Y                                                           | N                                                       | Y                                                       | N                                                                         | N                                                                                               | N                                                                  | N                                              | N                                    | 2           |
| Rustveld (2008)      | N                                 | N                                                    | N                                                | Y                                                           | Y                                                       | Y                                                       | N                                                                         | N                                                                                               | Y                                                                  | Y                                              | N                                    | 5           |
| Sanchez (2004)       | N                                 | N                                                    | N                                                | N                                                           | N                                                       | Y                                                       | N                                                                         | N                                                                                               | N                                                                  | N                                              | N                                    | 1           |
| Scannapieco (2003)   | N                                 | Y                                                    | N                                                | Y                                                           | N                                                       | Y                                                       | Y                                                                         | Y                                                                                               | N                                                                  | N                                              | N                                    | 5           |
| Sgolastra (2013)     | N                                 | Y                                                    | Y                                                | Y                                                           | Y                                                       | Y                                                       | Y                                                                         | Y                                                                                               | Y                                                                  | Y                                              | N                                    | 9           |
| Teshome (2016)       | N                                 | Y                                                    | N                                                | Y                                                           | N                                                       | Y                                                       | Y                                                                         | Y                                                                                               | N                                                                  | N                                              | N                                    | 5           |
| Vergnes (2007)       | N                                 | Y                                                    | N                                                | Y                                                           | N                                                       | Y                                                       | Y                                                                         | Y                                                                                               | Y                                                                  | Y                                              | N                                    | 7           |
| Vettore (2006)       | N                                 | N                                                    | N                                                | Y                                                           | N                                                       | Y                                                       | N                                                                         | N                                                                                               | Y                                                                  | Y                                              | N                                    | 4           |

|               |   |   |   |   |   |   |   |   |   |   |   |   |
|---------------|---|---|---|---|---|---|---|---|---|---|---|---|
| Wei (2013)    | N | Y | N | Y | N | Y | Y | Y | Y | Y | N | 7 |
| Wimmer (2008) | N | N | N | N | N | Y | N | N | Y | N | N | 2 |
| Xiong (2006)  | N | N | N | Y | N | Y | N | N | Y | N | N | 3 |
| Xiong (2007)  | N | N | N | Y | N | Y | N | N | Y | N | N | 3 |

**ABBREVIATIONS**

Y – Yes

N – No

**Appendix Table 5.** Evidence table on the association between periodontal disease and secondary outcome preeclampsia

| AUTHOR (YEAR)        | NUMBER OF INCLUDED PRIMARY STUDIES REPORTING ON PE | TOTAL NUMBER OF PARTICIPANTS | MAIN FINDINGS                            |                                                                                                                                                                                                                                                                                                                                                                                                                                                                                                                                                                                                                                             | METHODOLOGICAL QUALITY ASSESSMENT OF INCLUDED PRIMARY STUDIES (TOOL (MAX SCORE), MEAN SCORE, RANGE) | RISK OF BIAS ASSESSMENT (AMSTAR CHECKLIST, MAX 11) | SUMMARY OF FINDINGS                                                                                     |
|----------------------|----------------------------------------------------|------------------------------|------------------------------------------|---------------------------------------------------------------------------------------------------------------------------------------------------------------------------------------------------------------------------------------------------------------------------------------------------------------------------------------------------------------------------------------------------------------------------------------------------------------------------------------------------------------------------------------------------------------------------------------------------------------------------------------------|-----------------------------------------------------------------------------------------------------|----------------------------------------------------|---------------------------------------------------------------------------------------------------------|
|                      |                                                    |                              | RESULTS OF META-ANALYSIS: OR/RR (95%-CI) | RESULTS OF SUBGROUP ANALYSIS: OR/RR (95%-CI)                                                                                                                                                                                                                                                                                                                                                                                                                                                                                                                                                                                                |                                                                                                     |                                                    |                                                                                                         |
| Conde-Agudelo (2008) | 9                                                  | 3,912                        | OR 2.5 (1.4-4.1)                         | Of the nine primary included studies, three were not included in the meta-analysis. Of those, two reported a positive association between PD and PE (no OR/RR reported) and one found no association.                                                                                                                                                                                                                                                                                                                                                                                                                                       | Levine et al. and Downs et al. (max. 7.0)<br>Mean: 5.0<br>Range: 4.0-6.0                            | 7                                                  | PD showed a positive association with PE.                                                               |
| Huang (2014)         | 11                                                 | 3,579                        | OR 2.7 (1.7-4.2)                         | Adjustment for body weight (YES): OR 3.0 (1.2-7.7)<br>Adjustment for body weight (NO): OR 2.3 (1.6-3.4)<br><br>Adjustment for SES (YES): OR 5.2 (1.9-13.7)<br>Adjustment for SES (NO): OR 2.6 (1.6-4.0)<br><br>Case-control studies: OR 2.1 (1.3-3.4)<br>Cohort studies: OR 5.3 (2.1-11.0)<br><br>PD during pregnancy before 32 weeks: OR 3.7 (2.6–5.3)<br>PD within 48h prior to delivery: OR 2.7 (1.4–5.2)<br>PD within 5 day after delivery: OR 2.2 (1.2–4.3)<br><br>Quality assessment ≥5: OR 2.6 (1.7-4.0)<br>Quality assessment <5: OR 3.1 (2.0-4.8)<br><br>Sample size >100: OR 2.5 (1.5-4.0)<br>Sample size <100: OR 4.4 (1.9-10.6) | MOOSE (max. 6.0)<br>Mean: 5.0<br>Range: 4.0-6.0                                                     | 6                                                  | PD showed a positive association with PE, which was highly robust in subgroup and sensitivity analyses. |

|                  |    |       |                  |                                                                                                                                                                                                                                                                                                                                                                                                                                                                                                                                                                             |                                                                                                                                                                                                             |   |                                                                                                                                                                                                                    |
|------------------|----|-------|------------------|-----------------------------------------------------------------------------------------------------------------------------------------------------------------------------------------------------------------------------------------------------------------------------------------------------------------------------------------------------------------------------------------------------------------------------------------------------------------------------------------------------------------------------------------------------------------------------|-------------------------------------------------------------------------------------------------------------------------------------------------------------------------------------------------------------|---|--------------------------------------------------------------------------------------------------------------------------------------------------------------------------------------------------------------------|
| Ide (2013)       | 7  | 4,761 | Not reported     | <p>CC studies reporting PD as a categorical variable: OR 1.6 (1.4-1.9)</p> <p>CC studies reporting PD as a continuous variable (PD): WMD 0.89 (0.87-0.91) (controls more PD than cases)</p> <p>CC studies reporting PD as a continuous variable (CAL): WMD 0.96 (0.98-0.94) (controls more CAL than cases)</p> <p>CC studies reporting PD as a continuous variable (BOP): WMD 7.8 (7.4-8.2)</p> <p>A cohort study of Boggess et al. was not included in the meta-analysis. This study reported a significant positive association between PD and PE (OR 2.4 [1.1-5.3]).</p> | Not reported                                                                                                                                                                                                | 6 | There was a positive association between PD and PE in studies where PD was defined as a categorical variable or as BOP. A negative association of PD on PE was found in studies where PD was defined by PD or CAL. |
| Sgolastra (2013) | 15 | 5,111 | OR 2.2 (1.4-3.4) | <p>Case-control studies: OR 2.2 (1.3-3.6)</p> <p>Cohort studies: OR 2.2 (0.7-7.4)</p> <p>PD defined by CAL and PPD: OR 2.5 (1.5-4.4)</p> <p>PD defined by CAL alone: OR 1.5 (0.4-5.8)</p> <p>PD defined by PPD alone: OR 2.9 (1.0-8.2)</p> <p>Mild PD: OR 0.6 (0.3-1.3)</p> <p>Severe PD: OR 2.3 (0.9-5.7)</p> <p>Secure PD diagnosis: OR 1.6 (0.7-3.8)</p> <p>Insecure PD diagnosis: OR 2.7 (1.6-4.4)</p>                                                                                                                                                                  | <p>NOS-scale (max. 9.0)</p> <p>Mean: 6.7</p> <p>Range: 6.0-8.0</p>                                                                                                                                          | 9 | PD showed a positive association with PE. This finding was not consistent in subgroup and sensitivity analyses.                                                                                                    |
| Wei (2013)       | 15 | 4,711 | OR 2.8 (2.0-3.9) | <p>CC studies: OR 2.8 (1.9-4.1)</p> <p>Cohort studies: OR 3.1 (1.8-5.2)</p>                                                                                                                                                                                                                                                                                                                                                                                                                                                                                                 | <p>NOS-scale (max. 9.0)</p> <p>Mean: 6.9</p> <p>Range: 5.0-9.0</p>                                                                                                                                          | 7 | PD showed a positive association with PE.                                                                                                                                                                          |
| Kunnen (2010)    | 12 | 6,244 |                  | <p>6/12 studies reported a significant positive association between PD and PE (OR 2.1 to 20.2). One study showed a significant positive association between severe PD and PE (OR 7.9 [1.9-32.8]). One study showed a significant association between generalized periodontitis and PE (OR 2.5 [1.6-3.8]), but not between localized periodontitis and PE (OR 1.5 [0.9-2.4]). Four studies found no association between PD and PE (OR 0.7 to 1.1).</p>                                                                                                                       | <p>Dutch Cochrane collaboration checklist</p> <p>CC (max. 8.0)</p> <p>Mean: 6.6; Range: 5.0-8.0</p> <p>Cohort (max. 9.0)</p> <p>Mean: 7.0; Range: 7.0</p> <p>CS (max. 8.0)</p> <p>Mean: 5.0; Range: 5.0</p> | 7 | The majority of included studies identified a positive association between PD and PE.                                                                                                                              |
| Rustveld (2008)  | 3  | 1,335 |                  | <p>Three studies investigated the association between PD and PE, of which 2 reported a positive association. Only one reported an OR (OR 7.0 [1.7-29.8]). One study found no association (OR 0.9 for gingivitis and 1.2 for severe PD).</p>                                                                                                                                                                                                                                                                                                                                 | Not reported                                                                                                                                                                                                | 5 | PD showed a positive association with PE in two out of the three studies.                                                                                                                                          |
| Xiong (2006)     | 2  | 1,002 |                  | <p>Both included studies reported a significant association between PD and PE (OR 2.4 and 3.5).</p>                                                                                                                                                                                                                                                                                                                                                                                                                                                                         | Not reported                                                                                                                                                                                                | 3 | PD showed a positive association with PE.                                                                                                                                                                          |

|              |   |       |                                                                                                                                      |              |   |                                                                                        |
|--------------|---|-------|--------------------------------------------------------------------------------------------------------------------------------------|--------------|---|----------------------------------------------------------------------------------------|
| Xiong (2007) | 5 | 3,287 | Four out of five studies identified a positive association between PD and PE (OR 2.4 to 3.5), whereas one did not (OR 1.0 [0.7-1.4]) | Not reported | 3 | The majority of included studies identified a positive association between PD and PTB. |
|--------------|---|-------|--------------------------------------------------------------------------------------------------------------------------------------|--------------|---|----------------------------------------------------------------------------------------|

Reviews in which meta-analyses were performed are listed first, followed by reviews in which no meta-analysis was performed

#### ABBREVIATIONS

PE – Preeclampsia

OR – Odds ratio

RR – Relative risk

CI – Confidence interval

PD – Periodontal disease

Levine et al. – Levine M, Walter S, Lee H, Haines T, Holbrook A, Moyer V. Users' guides to the medical literature. IV. How to use an article about harm. Evidence-Based Medicine Working Group. JAMA 1994;271:1615-9

Downs et al. – Downs SH, Black N. The feasibility of creating a checklist for the assessment of the methodological quality both of randomised and non-randomised studies of health care interventions. J Epidemiol Community Health 1998;52:377-84.

SES – Socio-economic status

MOOSE – Stroup DF, Berlin JA, Morton SC, et al. Meta-analysis of observational studies in epidemiology: a proposal for re- porting. Meta-analysis Of Observational Studies in Epidemiology (MOOSE) group. JAMA, 2000,283(15): 2008-2012

CC – Case control

PD – Probing depth

WMD – Weighed mean difference

CAL – Clinical attachment loss

BOP – Bleeding on probing

PPD – Probing pocket depth

NOS-scale – Newcastle-Ottawa scale



**Appendix Table 6.** Evidence table on the association between periodontal disease and secondary outcome low birth weight

| AUTHOR (YEAR)    | NUMBER OF INCLUDED PRIMARY STUDIES REPORTING ON LBW | TOTAL NUMBER OF PARTICIPANTS | MAIN FINDINGS                            |                                                                                                                                                                                                                                                                                                                                                                                                                                                                                                                                   | METHODOLOGICAL QUALITY ASSESSMENT OF INCLUDED PRIMARY STUDIES (TOOL (MAX SCORE), MEAN SCORE, RANGE)                      | RISK OF BIAS ASSESSMENT (AMSTAR CHECKLIST, MAX 11) | SUMMARY OF FINDINGS                                                                                                                                                                                                                                 |
|------------------|-----------------------------------------------------|------------------------------|------------------------------------------|-----------------------------------------------------------------------------------------------------------------------------------------------------------------------------------------------------------------------------------------------------------------------------------------------------------------------------------------------------------------------------------------------------------------------------------------------------------------------------------------------------------------------------------|--------------------------------------------------------------------------------------------------------------------------|----------------------------------------------------|-----------------------------------------------------------------------------------------------------------------------------------------------------------------------------------------------------------------------------------------------------|
|                  |                                                     |                              | RESULTS OF META-ANALYSIS: OR/RR (95%-CI) | RESULTS OF SUBGROUP ANALYSIS: OR/RR (95%-CI)                                                                                                                                                                                                                                                                                                                                                                                                                                                                                      |                                                                                                                          |                                                    |                                                                                                                                                                                                                                                     |
| Chambrone (2011) | 5                                                   | 6,522                        | RR 2.1 (1.1-4.2)                         | <p>PD defined by PPD and CAL: RR 1.4 (1.0-2.0)<br/>                     PD defined by CAL alone: RR 11.4 (4.4-29.1)</p> <p>Mild PD defined by PPD and CAL:<br/>                     RR 1.3 (0.7-2.2)<br/>                     Moderate-severe defined by PPD and CAL:<br/>                     RR 1.8 (0.7-4.6)</p> <p>Saddki (2008) was not included in the meta-analysis. This cohort study found a positive association between PD and LBW, with the following ORs: crude OR 4.8 (2.1-10.7) and adjusted OR 3.8 (1.3-11.1)</p> | <p>NOS-scale (max. 14)<br/>                     Mean: 12.5<br/>                     Range: 11.0-13.0</p>                 | 7                                                  | <p>PD showed a positive association with LBW in the overall analysis. In subgroup analyses the association between PD and LBW was only statistically significant if PD was defined by CAL alone.</p>                                                |
| Corbella (2012b) | 7                                                   | 4,159                        | OR 1.8 (1.5-2.2)                         | No subgroup analysis performed                                                                                                                                                                                                                                                                                                                                                                                                                                                                                                    | Not reported                                                                                                             | 6                                                  | PD showed a significant association with LBW.                                                                                                                                                                                                       |
| Corbella (2016)  | 10                                                  | 5,693                        | RR 1.7 (1.3-2.1)                         | <p>Low risk of bias: 1.8 (1.3-2.6)<br/>                     Moderate risk of bias: 1.4 (1.1-1.7)</p>                                                                                                                                                                                                                                                                                                                                                                                                                              | <p>Cochrane Bias Methods Group (max. 5.0)<br/>                     Mean: 4.6<br/>                     Range: 4.0-5.0</p> | 8                                                  | <p>PD showed a significant association with LBW. This was independent of risk of bias of individual studies.</p>                                                                                                                                    |
| Ide (2013)       | 17                                                  | 13,370                       | Not performed                            | <p>CC studies reporting PD as a categorical variable: OR 1.3 (1.1-1.7)<br/>                     Prospective cohort studies reporting PD as categorical variable: RR 1.7 (1.4-2.2)<br/>                     Prospective cohort studies reporting PD as a continuous variable (PD):<br/>                     WMD 0.04 (-0.1-0.2)<br/>                     Prospective cohort studies reporting PD as a continuous variable (CAL):<br/>                     WMD 1.1 (0.8-1.5)</p>                                                    | <p>NOS-scale (max. 8)<br/>                     Mean: 5.7<br/>                     Range: 4-8</p>                         | 6                                                  | <p>PD showed a significant association with LBW. This was consistent for case control and prospective studies reporting PD as a categorical variable. This association was no longer observed in studies reporting PD as a continuous variable.</p> |

|                    |              |              |                                                                                                                                                                                                                                                                                             |                                |                                                                           |   |                                                                                            |
|--------------------|--------------|--------------|---------------------------------------------------------------------------------------------------------------------------------------------------------------------------------------------------------------------------------------------------------------------------------------------|--------------------------------|---------------------------------------------------------------------------|---|--------------------------------------------------------------------------------------------|
| Konopka (2012)     | 4            | 6,136        | OR 1.5 (1.3-1.8)                                                                                                                                                                                                                                                                            | No subgroup analysis performed | Margetts et al. (max. 100%)<br>Mean score: 59.3<br>Score range: 30.0-82.0 | 6 | PD showed a significant association with LBW.                                              |
| Vergnes (2007)     | Not reported | Not reported | OR 4.0 (2.1-7.9)                                                                                                                                                                                                                                                                            | No subgroup analysis performed | Margetts et al. (max. 100%)<br>Mean: 54.9<br>Range: 30.0-82.0             | 7 | PD showed a significant association with LBW.                                              |
| Corbella (2012a)   | 5            | 5,767        | Two out of five studies found a significant positive association between PD and LBW (OR 5.5 and 20.0). One study found a significant association between severe PD and LBW (OR 2.2 [1.3-3.4]), but not between mild PD and LBW (OR 1.2 [0.9-1.7]). Two studies did not find an association. |                                | Not reported                                                              | 2 | The majority of the included studies identified a positive association between PD and LBW. |
| Madianos (2002)    | 1            | 110          | One CC study was included which reported a negative association between PD and LBW (OR 0.3 [0.1-0.7])                                                                                                                                                                                       |                                | Not reported                                                              | 4 | One study included which showed a significant negative association between PD and LBW.     |
| Oliveira (2009)    | 8            | 1,912        | Seven out of eight studies reported a positive association between PD and LBW (only two studies reported an OR: 3.5 and 4.2, no 95% CI were reported). One study found no association (OR 0.9 [0.6-1.4]).                                                                                   |                                | Not reported                                                              | 2 | The majority of included studies identified a positive association between PD and LBW.     |
| Sanchez (2004)     | 3            | 1,197        | All three studies reported a positive association between PD and LBW. Only two studies reported an OR. Dasanayake (1998) reported that women with healthier gingiva had a lower risk of LBW (OR 0.3). Lopez (2002) found an OR of 3.6 for the relationship between PD and LBW.              |                                | Not reported                                                              | 1 | PD showed a positive association with LBW.                                                 |
| Scannapieco (2003) | 3            | 259          | Three studies reported on the association between PD and LBW. One found a positive association (OR 4.1 [1.3-12.8]), and two studies found a negative association. Only one of them reported an OR (OR 0.3 [0.1-0.7]).                                                                       |                                | Newman et al. and Kahn et al. (max. 4)<br>Mean: 3<br>Range: 3             | 5 | Contradictory findings on the association between PD and LBW from two studies.             |
| Teshome (2016)     | 5            | 1,128        | All five studies reported a significant positive association between PD and LBW (OR 2.2-4.0).                                                                                                                                                                                               |                                | NIH Checklist<br>Mean: 10<br>Range: 9-11                                  | 5 | PD showed a positive association with LBW.                                                 |
| Vettore (2006)     | 9            | 5,489        | Two out of nine studies found a significant association between PD and LBW (OR 2.2 and 4.1). Seven studies found no association.                                                                                                                                                            |                                | Not reported                                                              | 4 | The majority of included studies found no association between PD and LBW.                  |
| Wimmer (2008)      | 18           | 14,393       | 11/18 studies found a significant positive association between PD and LBW (OR/RR 1.1-4.2). One study found a positive association between PD and LBW only in women aged >25 years. Six studies found no association.                                                                        |                                | Not reported                                                              | 2 | The majority of included studies identified a positive association between PD and LBW.     |

|              |    |       |                                                                                                                                                                                                                                                                                           |              |   |                                                                                        |
|--------------|----|-------|-------------------------------------------------------------------------------------------------------------------------------------------------------------------------------------------------------------------------------------------------------------------------------------------|--------------|---|----------------------------------------------------------------------------------------|
| Xiong (2006) | 7  | 5,631 | One study found a significant association between PD and LBW (RR 3.6 [1.1-12.2]). One study found a significant association between moderate-severe PD and LBW (OR 2.1 [1.3-3.4]), but not between mild PD and LBW (OR 1.2 [0.9-1.7]). Five studies found no association (OR/RR 0.3-7.2). | Not reported | 3 | The majority of included studies found no association between PD and LBW.              |
| Xiong (2007) | 13 | 9,984 | 9/13 studies identified a positive association between PD and LBW (OR/RR 1.1 to 7.2), whereas four did not.                                                                                                                                                                               | Not reported | 3 | The majority of included studies identified a positive association between PD and LBW. |

Reviews in which meta-analyses were performed are listed first, followed by reviews in which no meta-analysis was performed.

#### ABBREVIATIONS

LBW – Low birth weight

OR – Odds ratio

RR – Relative risk

CI – Confidence interval

PD – Periodontal disease

PPD – Probing pocket depth

CAL – Clinical attachment loss

NOS-scale – Newcastle-Ottawa scale

CC – Case control

PD – Probing depth

WMD – Weighed mean difference

Margetts et al. – Margetts BM, Thompson RL, Key T, et al. Development of a scoring system to judge the scientific quality of information from case-control and cohort studies of nutrition and disease. *Nutr Cancer* 1995;24:231-239

NIH Checklist – The national institute of health checklist

**Appendix Table 7.** Evidence table on the association between periodontal disease and secondary small for gestational age

| AUTHOR (YEAR) | NUMBER OF INCLUDED PRIMARY STUDIES REPORTING ON SGA | TOTAL NUMBER OF PARTICIPANTS | MAIN FINDINGS                                                                                                                                                                 |                                              | METHODOLOGICAL QUALITY ASSESSMENT OF INCLUDED PRIMARY STUDIES (TOOL (MAX SCORE), MEAN SCORE, RANGE) | RISK OF BIAS ASSESSMENT (AMSTAR CHECKLIST, MAX 11) | SUMMARY OF FINDINGS                                                                   |
|---------------|-----------------------------------------------------|------------------------------|-------------------------------------------------------------------------------------------------------------------------------------------------------------------------------|----------------------------------------------|-----------------------------------------------------------------------------------------------------|----------------------------------------------------|---------------------------------------------------------------------------------------|
|               |                                                     |                              | RESULTS OF META-ANALYSIS: OR/RR (95%-CI)                                                                                                                                      | RESULTS OF SUBGROUP ANALYSIS: OR/RR (95%-CI) |                                                                                                     |                                                    |                                                                                       |
| Wimmer (2008) | 2                                                   | 2,382                        | Two studies investigated the association between PD and SGA, of which one found a positive association (RR 2.3 [1.1-4.7]). One study found no association (OR 2.1 [0.8-5.9]). |                                              | Not reported                                                                                        | 2                                                  | Two studies included of which one found a significant association between PD and SGA. |

**ABBREVIATIONS**

SGA – Small for gestational age  
 OR – Odds ratio  
 RR – Relative risk  
 CI – Confidence interval  
 PD – Periodontal disease

**Appendix Table 8.** Evidence table on the association between periodontal disease and secondary outcome preterm low birth weight

| AUTHOR (YEAR)    | NUMBER OF INCLUDED PRIMARY STUDIES REPORTING ON PLBW | TOTAL NUMBER OF PARTICIPANTS | MAIN FINDINGS                            |                                                                                                                                                                                                                                                                                                                                                                                                                                                                                                                          | METHODOLOGICAL QUALITY ASSESSMENT OF INCLUDED PRIMARY STUDIES (TOOL (MAX SCORE), MEAN SCORE, RANGE) | RISK OF BIAS ASSESSMENT (AMSTAR CHECKLIST, MAX 11) | SUMMARY OF FINDINGS                                                                                                                                                                     |
|------------------|------------------------------------------------------|------------------------------|------------------------------------------|--------------------------------------------------------------------------------------------------------------------------------------------------------------------------------------------------------------------------------------------------------------------------------------------------------------------------------------------------------------------------------------------------------------------------------------------------------------------------------------------------------------------------|-----------------------------------------------------------------------------------------------------|----------------------------------------------------|-----------------------------------------------------------------------------------------------------------------------------------------------------------------------------------------|
|                  |                                                      |                              | RESULTS OF META-ANALYSIS: OR/RR (95%-CI) | RESULTS OF SUBGROUP ANALYSIS: OR/RR (95%-CI)                                                                                                                                                                                                                                                                                                                                                                                                                                                                             |                                                                                                     |                                                    |                                                                                                                                                                                         |
| Chambrone (2011) | 5                                                    | 2,869                        | RR 3.6 (1.9-6.8)                         | PD defined by PPD and CAL: RR 2.6 (1.1-6.5)<br>PD defined by CAL alone: RR 11.7 (2.5-54.4)<br>PD defined by PPD alone: RR 3.8 (1.2-12.0)                                                                                                                                                                                                                                                                                                                                                                                 | NOS-scale (max. 14)<br>Mean: 12.2<br>Range: 10.0-13.0                                               | 7                                                  | PD showed a significant association with PLBW, which was consistent across different diagnostic criteria for PD.                                                                        |
| Corbella (2012b) | 3                                                    | 2,093                        | OR 3.0 (1.9-4.7)                         | No subgroup analysis performed                                                                                                                                                                                                                                                                                                                                                                                                                                                                                           | Not reported                                                                                        | 6                                                  | PD showed a significant association with PLBW.                                                                                                                                          |
| Corbella (2016)  | 4                                                    | 2,263                        | RR 3.4 (1.3-8.8)                         | Low risk of bias: RR 6.2 (0.3-117.9)<br>Moderate risk of bias: RR 1.9 (1.5–2.5)                                                                                                                                                                                                                                                                                                                                                                                                                                          | Cochrane Bias Methods Group (max. 5)<br>Mean: 4.5<br>Range: 4.0-5.0                                 | 8                                                  | PD showed a significant association with PLBW in the overall analysis. The association was not statistically significant for studies with low risk of bias, likely due to very wide CI. |
| Ide (2013)       | 11                                                   | 4,570                        | Not reported                             | CC studies reporting PD as a categorical variable: OR 2.1 (1.3-3.2)<br>CC studies reporting PD as a continuous variable (PD): WMD -0.13 (-0.13, -0.12)<br>CC studies reporting PD as a continuous variable (CAL): WMD 0.07 (-0.01-0.16)<br>CC studies reporting PD as a continuous variable (BOP): WMD -0.08 (-6.4-6.3)<br>Prospective cohort studies reporting PD as a continuous variable (PD): WMD 0.25 (-0.08-0.57)<br>Prospective cohort studies reporting PD as a continuous variable (CAL): WMD 0.3 (-0.003-0.59) | NOS-scale (max. 8)<br>Mean: 5<br>Range: 4.0-7.0                                                     | 5                                                  | PD showed positive association with PBLW only in CC studies where PD was reported as a categorical variable.                                                                            |

|                    |    |        |                                                                                                                                              |                                                                                                                                                                       |                                                                           |   |                                                                                         |
|--------------------|----|--------|----------------------------------------------------------------------------------------------------------------------------------------------|-----------------------------------------------------------------------------------------------------------------------------------------------------------------------|---------------------------------------------------------------------------|---|-----------------------------------------------------------------------------------------|
| Khader (2005)      | 2  | 204    | OR 5.3 (2.2-12.6)                                                                                                                            | No subgroup analysis performed                                                                                                                                        | Margetts et al. (max. 100%)<br>Mean: 60.1<br>Range: 49.1-71.2             | 7 | PD showed a significant association with PLBW.                                          |
| Konopka (2012)     | 22 | 12,047 | OR 2.3 (1.9-2.9)                                                                                                                             | No subgroup analysis performed                                                                                                                                        | Margetts et al. (max. 100%)<br>Mean score: 49.0<br>Score range: 29.0-82.0 | 6 | PD showed a significant association with PLBW.                                          |
| Vergnes (2007)     | 17 | 7,151  | OR 2.8 (2.0-4.1)                                                                                                                             | A sensitivity analysis showed that one study significantly deviated from the calculated overall effect. Without this study, the overall OR increased to 3.2 (2.5-4.3) | Margetts et al. (max. 100%)<br>Mean: 54.9<br>Range: 30.0-82.0             | 7 | PD showed a significant association with PLBW.                                          |
| Corbella (2012a)   | 4  | 1,909  | Two out of four studies found a significant positive association between PD and PLBW (OR 1.8-2.6). Two studies found no association.         |                                                                                                                                                                       | Not reported                                                              | 2 | Half of the included studies identified a positive association between PD and PLBW.     |
| Madianos (2002)    | 2  | 1,379  | Both studies showed a positive association between PD and PLBW (OR 4.5-7.9)                                                                  |                                                                                                                                                                       | Not reported                                                              | 4 | PD showed a significant association with PLBW in two studies.                           |
| Oliveira (2009)    | 9  | 2,782  | Six out of nine studies found a positive association between PD and PLBW (OR/RR 3.0-20.0). Three studies found no association.               |                                                                                                                                                                       | Not reported                                                              | 2 | The majority of included studies identified a positive association between PD and PLBW. |
| Sanchez (2004)     | 6  | 1,708  | Four out of six studies found a positive association between PD and PLBW (OR/RR 3.5-7.9). Two studies reported no association.               |                                                                                                                                                                       | Not reported                                                              | 1 | The majority of included studies identified a positive association between PD and PLBW. |
| Scannapieco (2003) | 6  | 2,880  | Five out of six studies reported a positive association between PD and PLBW (OR 2.2-7.9). One study found no association (OR 0.8 [0.7-1.0]). |                                                                                                                                                                       | Newman et al. and Kahn et al. (max. 4)<br>Mean: 3.3<br>Range: 4-5         | 5 | The majority of included studies identified a positive association between PD and PLBW. |
| Teshome (2016)     | 2  | 686    | Both studies reported a significant positive association between PD and PLBW (OR 2.0-3.1).                                                   |                                                                                                                                                                       | NIH Checklist<br>Mean: 8.5<br>Range: 8-9                                  | 5 | PD showed an association with PLBW in two studies.                                      |
| Vettore (2006)     | 13 | 2,504  | 6/13 studies reported a positive association between PD and PLBW (OR 3.5-7.9), Seven studies found no association (OR 0.7-3.9)               |                                                                                                                                                                       | Not reported                                                              | 4 | A small majority of included studies reported no association between PD and PLBW.       |
| Wimmer (2008)      | 14 | 5,501  | 7/14 reported a positive association between PD and PLBW (OR/RR 3.3-8.9). Seven studies did not find this association                        |                                                                                                                                                                       | Not reported                                                              | 2 | Half of the included studies identified a positive association between PD and PLBW.     |

|              |   |       |                                                                                                                                                   |              |   |                                                                                     |
|--------------|---|-------|---------------------------------------------------------------------------------------------------------------------------------------------------|--------------|---|-------------------------------------------------------------------------------------|
| Xiong (2006) | 6 | 2,054 | Three out of six studies reported a positive association between PD and PLBW (OR 3.5 to 7.5). Three studies found no association (OR 0.8-1.9).    | Not reported | 3 | Half of the included studies identified a positive association between PD and PLBW. |
| Xiong (2007) | 7 | 2,105 | Three out of seven studies reported a positive association between PD and PLBW (OR/RR 3.5 to 7.5), four studies found no association (OR 0.8-1.9) | Not reported | 3 | The majority of the studies reported no association between PD and PLBW.            |

Reviews in which meta-analyses were performed are listed first, followed by reviews in which no meta-analysis was performed.

#### ABBREVIATIONS

PLBW – Preterm low birth weight

OR – Odds ratio

RR – Relative risk

CI – Confidence interval

PD – Periodontal disease

PPD – Probing pocket depth

CAL – Clinical attachment loss

NOS-scale – Newcastle-Ottawa scale

CC – Case control

PD – Probing depth

WMD – Weighed mean difference

BOP – Bleeding on probing

Margetts et al. – Margetts BM, Thompson RL, Key T, et al. Development of a scoring system to judge the scientific quality of information from case-control and cohort studies of nutrition and disease. *Nutr Cancer* 1995;24:231-239

NIH Checklist – The National Institute of Health Checklist

**Appendix Table 9.** Citation matrix primary outcome preterm birth

| Primary included studies<br>(first author, year) | Study classification | Country where study is<br>conducted | Chambrone (2011) | Corbella (2012a) | Corbella (2012b) | Corbella (2016) | Ide (2013) | Khader (2005) | Konopka (2012) | Madianos (2002) | Oliveira (2009) | Sanchez (2004) | Teshome (2016) | Vergnes (2007) | Vettore (2006) | Wimmer (2008) | Xiong (2006) | Xiong (2007) |
|--------------------------------------------------|----------------------|-------------------------------------|------------------|------------------|------------------|-----------------|------------|---------------|----------------|-----------------|-----------------|----------------|----------------|----------------|----------------|---------------|--------------|--------------|
| Agueda 2008                                      | Cohort               | Spain                               | x                | x                | x                | x               | x          |               | x              |                 |                 |                |                |                |                | x             |              |              |
| AlHabashneh 2012                                 | Cohort               | Jordan                              |                  |                  |                  |                 | x          |               |                |                 |                 |                |                |                |                |               |              |              |
| Ali 2012                                         | Cohort               | Malaysia                            |                  |                  |                  | x               |            |               |                |                 |                 |                |                |                |                |               |              |              |
| Arteaga-Guerra 2010                              | Cohort               | Columbia                            |                  |                  |                  |                 |            |               | x              |                 |                 |                |                |                |                |               |              |              |
| Bassini 2007                                     | CC                   | Brazil                              |                  |                  |                  |                 |            |               |                |                 | x               |                |                |                |                | x             |              |              |
| Bosnjak 2006                                     | CC                   | Croatia                             |                  |                  |                  |                 | x          |               | x              |                 | x               |                |                |                |                | x             |              | x            |
| Castaldi 2006                                    | Cohort               | Argentina                           |                  |                  |                  |                 |            |               |                |                 |                 |                |                |                |                |               |              | x            |
| Dasanayake 2001                                  | CC                   | USA                                 |                  |                  |                  |                 |            | x             |                |                 |                 |                |                |                |                |               |              |              |
| Davenport 2002                                   | CC                   | UK                                  |                  |                  |                  |                 |            |               |                |                 |                 |                |                |                |                |               |              | x            |
| Dortbudak 2005                                   | Cohort               | Austria                             |                  | x                |                  |                 |            |               |                |                 |                 |                |                |                |                | x             | x            | x            |
| Farrell 2006                                     | Cohort               | UK                                  |                  |                  |                  |                 |            |               |                |                 |                 |                |                |                |                | x             |              | x            |
| Fraser 2004                                      | CC                   | Canada                              |                  |                  |                  |                 |            |               |                |                 |                 |                |                |                |                |               | x            |              |
| Gianella 2011                                    | CC                   | Italy                               |                  |                  |                  |                 | x          |               |                |                 |                 |                |                |                |                |               |              |              |
| Glesse 2004                                      | CC                   | Brazil                              |                  |                  |                  |                 |            |               |                |                 |                 |                |                | x              |                |               |              |              |



|                 |        |           |   |   |   |   |   |   |   |   |   |   |   |   |   |   |   |   |
|-----------------|--------|-----------|---|---|---|---|---|---|---|---|---|---|---|---|---|---|---|---|
| Goepfert 2004   | CC     | USA       |   | x | x | x |   |   | x |   | x |   |   | x | x | x | x | x |
| Grandi 2010     | CC     | Argentina |   |   |   |   |   |   |   |   |   |   | x |   |   |   |   |   |
| Guimaraes 2010  | Cohort | Brazil    |   |   | x | x | x |   |   |   |   |   |   |   |   |   |   |   |
| Hasegawa 2003   | CC     | Japan     |   |   |   |   |   |   |   |   |   |   |   |   | x |   |   |   |
| Heimonen 2009   | CC     | Finland   |   | x |   |   | x |   |   |   |   |   |   |   |   |   |   |   |
| Holbrook 2004   | Cohort | Iceland   |   | x |   |   |   |   |   |   |   |   |   |   | x | x | x | x |
| Iwanaga 2011    | CC     | Japan     |   |   |   |   | x |   |   |   |   |   |   |   |   |   |   |   |
| Jarjoura 2005   | CC     | USA       |   | x | x | x | x |   |   |   | x |   |   | x | x | x | x | x |
| Jeffcoat 2001   | Cohort | USA       | x | x |   |   |   | x | x | x | x | x |   | x | x | x | x | x |
| Khader 2009     | CC     | Jordan    |   | x |   |   |   |   |   |   |   |   |   |   |   |   |   |   |
| Konopka 2003    | CC     | Poland    |   |   |   |   |   |   |   |   |   |   |   | x |   |   |   |   |
| Kukkamal 2014   | CC     | India     |   |   |   |   |   |   |   |   |   |   | x |   |   |   |   |   |
| Le 2007         | CC     | Thailand  |   |   |   |   | x |   |   |   |   |   |   |   |   |   |   |   |
| Lin 2007        | CC     | USA       |   | x |   |   |   |   |   |   |   |   |   |   |   |   |   |   |
| Lopez 2002a     | Cohort | Chile     |   | x |   |   |   |   |   |   |   |   |   |   |   | x |   |   |
| Lopez 2002b     | CC     | Chile     |   |   |   |   |   | x |   |   |   |   |   |   |   |   | x | x |
| Lunardelli 2005 | CS     | Brazil    |   |   |   |   | x |   |   |   |   |   |   | x | x |   |   | x |
| Macedo 2014     | CC     | Brazil    |   |   |   | x |   |   |   |   |   |   |   |   |   |   |   |   |
| Madianos 2001   | Cohort | USA       |   | x |   |   |   |   |   |   |   |   |   |   | x |   |   |   |
| Mannem 2011     | CC     | India     |   |   |   |   |   |   |   |   |   |   | x |   |   |   |   |   |
| Marin 2005      | CS     | Brazil    |   |   | x | x |   |   |   |   |   |   |   | x | x |   |   |   |
| Meurman 2006    | Cohort | Finland   |   |   |   |   |   |   |   |   |   |   |   |   |   | x |   |   |
| Mobeen 2008     | Cohort | Pakistan  |   | x |   |   |   |   |   |   |   |   |   |   |   |   |   |   |
| Moliterno 2005  | CC     | Brazil    |   |   |   |   |   |   | x |   |   |   |   | x |   |   |   |   |
| Moore 2004a     | Cohort | UK        | x | x |   |   | x |   |   |   |   |   |   | x | x |   | x | x |
| Moore 2004b     | CC     | UK        |   |   |   |   |   |   |   |   |   |   |   |   | x | x |   |   |
| Moore 2005      | CC     | UK        |   | x |   |   | x |   |   |   | x |   |   |   | x | x | x | x |

|                       |        |            |   |   |   |   |   |   |   |  |  |   |   |  |   |  |   |   |   |   |   |   |
|-----------------------|--------|------------|---|---|---|---|---|---|---|--|--|---|---|--|---|--|---|---|---|---|---|---|
| Moreu 2005            | Cohort | Spain      |   |   |   |   |   |   |   |  |  |   | x |  |   |  | x | x |   | x |   |   |
| Mumghamba             | CC     | Tanzania   |   |   |   |   |   |   |   |  |  |   |   |  | x |  |   |   |   |   |   |   |
| Nabet 2010            | CC     | France     |   |   | x | x | x |   |   |  |  |   |   |  |   |  |   |   |   |   |   |   |
| Noack 2005            | CC     | Germany    |   |   |   |   |   |   |   |  |  |   |   |  |   |  | x |   |   |   |   |   |
| Offenbacher 1996      | CC     | USA        |   | x |   |   |   |   | x |  |  |   |   |  |   |  | x |   |   |   |   |   |
| Offenbacher 2001      | Cohort | USA        | x | x |   |   |   |   |   |  |  |   | x |  |   |  |   |   | x | x | x |   |
| Offenbacher 2006      | Cohort | USA        | x |   | x | x | x |   |   |  |  |   | x |  |   |  |   |   | x |   | x |   |
| Oittinen 2005         | Cohort | Finland    |   |   |   |   |   |   |   |  |  |   |   |  |   |  |   |   | x |   |   |   |
| Piscoya 2012          | CC     | Brazil     |   |   |   |   |   | x |   |  |  |   |   |  |   |  |   |   |   |   |   |   |
| Pitiphat 2008         | Cohort | USA        | x | x |   |   |   |   |   |  |  |   |   |  |   |  |   |   |   | x |   |   |
| Radnai 2004           | CC     | Hungary    |   | x | x | x |   |   |   |  |  |   |   |  |   |  |   |   | x | x | x |   |
| Radnai 2006           | CC     | Hungary    |   | x | x | x | x |   |   |  |  |   | x |  |   |  |   |   | x |   | x |   |
| Rajapakse 2004        | Cohort | Sri Lanka  |   | x |   |   |   |   |   |  |  | x |   |  |   |  |   |   |   |   |   |   |
| Rajapakse 2005        | Cohort | Sri Lanka  |   |   |   |   |   |   |   |  |  |   |   |  |   |  |   |   | x |   | x |   |
| Rakoto-Alson 2010     | Cohort | Madagascar | x |   | x | x | x |   |   |  |  |   |   |  |   |  |   |   |   |   |   |   |
| Romero 2002           | Cohort | Venezuela  |   | x |   |   |   |   |   |  |  |   |   |  |   |  |   |   |   | x |   |   |
| Ryu 2010              | CC     | Korea      |   |   | x | x |   |   |   |  |  |   |   |  |   |  |   |   |   |   |   |   |
| Saddki 2008           | Cohort | Malaysia   |   |   |   |   |   |   |   |  |  |   |   |  |   |  |   |   |   |   |   |   |
| Sanchez 2007          | Cohort | USA        |   |   |   |   |   |   |   |  |  |   |   |  |   |  |   |   |   |   | x |   |
| Santa Cruz 2013       | Cohort | Spain      |   |   |   |   | x |   |   |  |  |   |   |  |   |  |   |   |   |   |   |   |
| Santos-Pereira 2007   | Cohort | Brazil     |   |   |   |   |   | x |   |  |  |   | x |  |   |  |   |   |   |   | x |   |
| Sharma 2007           | Cohort | Fiji       |   | x |   |   |   |   |   |  |  |   |   |  |   |  |   |   |   |   |   |   |
| Siqueira (Mafra) 2007 | CC     | Brazil     |   | x | x | x | x |   |   |  |  |   |   |  |   |  |   |   |   |   |   |   |
| Skuldbol 2006         | CC     | Denmark    |   |   |   |   |   |   |   |  |  |   |   |  |   |  |   |   |   |   | x | x |
| Srinivas 2009         | Cohort | USA        | x | x |   |   |   | x |   |  |  |   |   |  |   |  |   |   |   |   |   |   |
| Toygar 2007           | Cohort | Turkey     |   |   |   |   |   |   |   |  |  |   |   |  |   |  |   |   |   |   | x |   |
| Vettore 2008          | CC     | Brazil     |   |   |   |   |   |   |   |  |  |   |   |  |   |  |   |   |   |   | x |   |

|           |        |        |  |   |   |   |   |  |  |  |  |  |  |  |  |   |   |
|-----------|--------|--------|--|---|---|---|---|--|--|--|--|--|--|--|--|---|---|
| Vogt 2010 | Cohort | Brazil |  |   | x | x | x |  |  |  |  |  |  |  |  |   |   |
| Wood 2006 | CC     | Canada |  | x | x | x | x |  |  |  |  |  |  |  |  | x | x |

**ABBREVIATIONS**

CC – Case control  
 USA – United States of America  
 UK – United Kingdom  
 CS – Cross sectional

**Appendix Table 10.** Citation matrix secondary outcome preeclampsia

| Primary included study<br>(first author, year) | Study classification | Country where study is<br>conducted | Conde-Agudelo (2008) | Huang (2014) | Ide (2013) | Rustveld (2008) | Kunnen (2010) | Sgolastra (2013) | Wei (2013) | Xiong (2006) | Xiong (2007) |
|------------------------------------------------|----------------------|-------------------------------------|----------------------|--------------|------------|-----------------|---------------|------------------|------------|--------------|--------------|
| Barak 2007                                     | CC                   | Israël                              | x                    |              |            |                 |               |                  |            |              |              |
| Boguess 2003                                   | Cohort               | USA                                 | x                    | x            | x          | x               | x             | x                | x          | x            | x            |
| Canakci 2004                                   | CC                   | Turkey                              | x                    | x            | x          | x               | x             | x                | x          | x            | x            |
| Canakci 2007                                   | CC                   | Turkey                              |                      |              |            |                 | x             | x                | x          |              |              |
| Castaldi 2006                                  | Cohort               | Argentina                           | x                    |              |            |                 | x             |                  | x          |              | x            |
| Chaparro 2012                                  | CC                   | Chile                               |                      |              |            |                 |               | x                |            |              |              |
| Contreras 2006                                 | CC                   | Colombia                            | x                    | x            | x          | x               | x             |                  | x          |              | x            |
| Cota 2006                                      | CC                   | Brazil                              | x                    |              |            |                 |               |                  | x          |              |              |
| Ha 2011                                        | CC                   | Korea                               |                      | x            |            |                 |               | x                | x          |              |              |
| Khader 2006                                    | CC                   | Jordan                              | x                    |              | x          |                 | x             |                  |            |              |              |
| Kumar 2013                                     | Cohort               | India                               |                      | x            |            |                 |               | x                |            |              |              |
| Kunnen 2007                                    | CC                   | Netherlands                         | x                    |              |            |                 | x             | x                | x          |              |              |
| Lohsoonthorn 2009                              | CC                   | Thailand                            |                      | x            |            |                 | x             | x                | x          |              |              |
| Moura da Silva 2012                            | CC                   | Brazil                              |                      | x            |            |                 |               | x                | x          |              |              |
| Nabet 2010                                     | CC                   | France                              |                      |              | x          |                 | x             |                  |            |              |              |

|                      |        |        |   |   |   |  |   |   |   |  |   |
|----------------------|--------|--------|---|---|---|--|---|---|---|--|---|
| Oettinger-Barak 2005 | CC     | Israel | x |   |   |  |   |   |   |  | x |
| Politano 2011        | CC     | Brazil |   | x |   |  |   | x | x |  |   |
| Sayar 2011           | CC     | Iran   |   |   |   |  |   |   | x |  |   |
| Shetty 2010          | CC     | India  |   | x |   |  | x | x | x |  |   |
| Siqueira 2008        | CC     | Brazil |   | x | x |  | x | x | x |  |   |
| Srinivas 2009        | Cohort | USA    |   |   |   |  | x | x |   |  |   |
| Taghzouti 2012       | CC     | Canada |   | x | x |  |   | x | x |  |   |
| Wang 2012            | CC     | Japan  |   |   |   |  |   | x |   |  |   |

**ABBREVIATIONS**

CC – Case control

USA – United States of America

**Appendix Table 11.** Citation matrix secondary outcome low birth weight

| Primary included study<br>(first author, year) | Study classification | Country where study<br>was conducted | Chambrone (2011) | Corbella (2012a) | Corbella (2012b) | Corbella (2016) | Ide (2013) | Konopka (2012) | Madianos (2002) | Oliveira (2009) | Sanchez (2004) | Scannapieco (2003) | Teshome (2016) | Vergnes (2007) | Vettore (2006) | Wimmer (2008) | Xiong (2006) | Xiong (2007) |
|------------------------------------------------|----------------------|--------------------------------------|------------------|------------------|------------------|-----------------|------------|----------------|-----------------|-----------------|----------------|--------------------|----------------|----------------|----------------|---------------|--------------|--------------|
| Agueda 2008                                    | Cohort               | Spain                                | x                |                  | x                | x               | x          |                |                 |                 |                |                    |                |                |                | x             |              |              |
| Ahmed Haerian 2013                             | CC                   | Iran                                 |                  |                  |                  |                 |            |                |                 |                 |                |                    | x              |                |                |               |              |              |
| AlHabashneh 2012                               | Cohort               | Jordan                               |                  |                  |                  |                 | x          |                |                 |                 |                |                    |                |                |                |               |              |              |
| Ali 2012                                       | Cohort               | Malaysia                             |                  |                  |                  | x               |            |                |                 |                 |                |                    |                |                |                |               |              |              |
| Bassani 2007                                   | CC                   | Brazil                               |                  |                  |                  |                 | x          | x              |                 | x               |                |                    |                |                |                |               |              |              |
| Boggess 2006                                   | Cohort               | USA                                  |                  |                  |                  |                 | x          |                |                 |                 |                |                    |                |                |                |               |              |              |
| Castaldi 2006                                  | Cohort               | Argentina                            |                  |                  |                  |                 |            |                |                 |                 |                |                    |                |                |                |               |              | x            |
| Cisse 2015                                     | CC                   | Senegal                              |                  |                  |                  |                 |            |                |                 |                 |                |                    | x              |                |                |               |              |              |
| Cruz 2005                                      | CC                   | Brazil                               |                  |                  |                  |                 |            |                |                 |                 |                |                    | x              |                | x              |               |              | x            |
| Cruz 2009                                      | CC                   | Brazil                               |                  |                  | x                | x               | x          |                |                 |                 |                |                    |                |                |                |               |              |              |
| Dasanayake 1998                                | CC                   | USA                                  |                  |                  |                  |                 |            |                | x               | x               | x              | x                  |                |                | x              | x             | x            | x            |
| Dasanayake 2001                                | CC                   | USA                                  |                  |                  |                  |                 |            |                |                 |                 | x              | x                  |                |                | x              | x             |              |              |
| Dortbudak 2005                                 | Cohort               | Austria                              |                  | x                |                  |                 |            |                |                 |                 |                |                    |                |                |                |               |              |              |
| Farrell 2006                                   | Cohort               | UK                                   |                  |                  |                  |                 | x          |                |                 |                 |                |                    |                |                |                | x             |              | x            |
| Gomes-Fihlo 2006                               | CC                   | Brazil                               |                  |                  |                  |                 | x          |                |                 |                 |                |                    |                |                |                |               |              |              |

|                      |        |            |   |   |   |   |   |  |   |  |   |  |  |   |   |   |   |   |   |   |
|----------------------|--------|------------|---|---|---|---|---|--|---|--|---|--|--|---|---|---|---|---|---|---|
| Guimaraes 2012       | CS     | Brazil     |   |   |   |   | x |  |   |  |   |  |  |   |   |   |   |   |   |   |
| Jarjoura 2005        | CC     | USA        |   |   |   |   |   |  | x |  | x |  |  |   | x | x |   | x | x |   |
| Konopka 2003         | CC     | Poland     |   |   |   |   |   |  |   |  |   |  |  |   | x |   |   |   |   |   |
| Kukkamal 2014        | CC     | India      |   |   |   |   |   |  |   |  |   |  |  | x |   |   |   |   |   |   |
| Lopez 2002b          | CC     | Chile      |   |   |   |   |   |  |   |  | x |  |  |   |   |   | x | x | x |   |
| Louro 2001           | CC     | Brazil     |   |   |   |   |   |  |   |  |   |  |  |   | x | x |   | x | x |   |
| Lunardelli 2005      | CS     | Brazil     |   |   |   |   | x |  |   |  |   |  |  |   | x | x | x |   | x |   |
| Marin 2005           | CS     | Brazil     |   |   | x | x | x |  |   |  | x |  |  |   | x |   | x |   |   |   |
| Meurman 2006         | Cohort | Finland    |   |   |   |   |   |  |   |  |   |  |  |   |   |   | x |   |   |   |
| Moliterno 2005       | CC     | Brazil     |   |   |   |   |   |  |   |  | x |  |  |   | x | x |   |   | x |   |
| Moore 2004           | Cohort | UK         | x | x |   |   |   |  | x |  |   |  |  |   | x | x | x | x | x |   |
| Moore 2005           | CC     | UK         |   |   |   |   | x |  |   |  |   |  |  |   |   |   |   |   |   |   |
| Moreu 2005           | Cohort | Spain      |   |   |   |   |   |  |   |  | x |  |  |   |   | x | x |   | x |   |
| Mumghamba 2007       | CC     | Tanzania   |   |   | x | x |   |  |   |  |   |  |  |   |   |   |   |   |   |   |
| Noack 2005           | CC     | Germany    |   |   |   |   |   |  |   |  |   |  |  |   |   | x |   |   |   |   |
| Oettinger-Barak 2005 | CC     | Israel     |   |   |   |   |   |  |   |  |   |  |  |   |   |   |   |   |   |   |
| Offenbacher 1996     | CC     | USA        |   |   |   |   |   |  |   |  |   |  |  |   |   | x |   |   |   |   |
| Offenbacher 2001     | Cohort | USA        | x | x |   |   |   |  |   |  |   |  |  |   |   |   |   | x | x | x |
| Radnai 2004          | CC     | Hungary    |   |   |   |   |   |  |   |  |   |  |  |   |   | x |   |   |   |   |
| Radnai 2006          | CC     | Hungary    |   | x |   |   |   |  |   |  | x |  |  |   |   |   |   | x |   |   |
| Rajapakse 2005       | Cohort | Sri Lanka  |   | x |   |   |   |  |   |  |   |  |  |   |   | x |   | x |   |   |
| Rakoto-Alson 2010    | Cohort | Madagascar | x |   | x | x | x |  |   |  |   |  |  |   |   |   |   |   |   |   |
| Romero 2002          | Cohort | Venezuela  |   |   |   |   |   |  |   |  |   |  |  |   | x |   |   | x |   |   |
| Saddki 2007          | Cohort | Malaysia   | x |   |   |   | x |  |   |  |   |  |  |   |   |   |   |   |   |   |
| Sanchez 2007         | Cohort | USA        |   |   |   |   |   |  |   |  |   |  |  |   |   |   |   | x |   |   |
| Santa Cruz 2013      | Cohort | Spain      |   |   |   |   | x |  |   |  |   |  |  |   |   |   |   |   |   |   |
| Santos-Pereira 2007  | Cohort | Brazil     |   |   |   |   |   |  |   |  |   |  |  |   |   |   |   | x |   |   |





**Appendix Table 12.** Citation matrix secondary outcome preterm low birth weight

| <b>Primary included study<br/>(first author, year)</b> | <b>Study classification</b> | <b>Country where study is<br/>conducted</b> | Chambrone (2011) | Corbella (2012a) | Corbella (2012b) | Corbella (2016) | Ide (2013) | Khader (2005) | Konopka (2012) | Madianos (2002) | Oliveira (2009) | Sanchez (2004) | Scannapieco 2003 | Teshome (2016) | Vergnes (2007) | Vettore (2006) | Wimmer (2008) |
|--------------------------------------------------------|-----------------------------|---------------------------------------------|------------------|------------------|------------------|-----------------|------------|---------------|----------------|-----------------|-----------------|----------------|------------------|----------------|----------------|----------------|---------------|
| Aerleaga-Guerra 2010                                   | Cohort                      | Colombia                                    |                  |                  |                  |                 |            |               | x              |                 |                 |                |                  |                |                |                |               |
| Agueda 2008                                            | Cohort                      | Spain                                       | x                | x                | x                | x               | x          |               | x              |                 |                 |                |                  |                |                |                | x             |
| Alves, Ribeiro 2006                                    | CC                          | Brazil                                      |                  |                  |                  |                 |            |               |                |                 |                 |                |                  |                |                |                | x             |
| Bassani 2007                                           | CC                          | Brazil                                      |                  |                  |                  |                 |            |               | x              |                 |                 |                |                  |                |                |                | x             |
| Betleja 2004                                           | CC                          | Poland                                      |                  |                  |                  |                 |            |               | x              |                 |                 |                |                  |                |                |                |               |
| Bosnjak 2006                                           | CC                          | Croatia                                     |                  |                  |                  |                 |            |               | x              |                 |                 |                |                  |                |                |                |               |
| Budunelli 2005                                         | CC                          | Turkey                                      |                  |                  |                  |                 | x          |               |                |                 |                 |                |                  |                |                | x              | x             |
| Cardoso 1999                                           | CC                          | Brazil                                      |                  |                  |                  |                 |            |               |                |                 |                 |                |                  |                |                | x              |               |
| Carta 2004                                             | CC                          | Italy                                       |                  |                  |                  |                 |            |               |                |                 |                 |                |                  |                |                | x              |               |
| Dasanayake 2001                                        | CC                          | USA                                         |                  |                  |                  |                 |            | x             |                |                 |                 |                |                  |                |                |                |               |
| Davenport 1998                                         | CC                          | UK                                          |                  |                  |                  |                 |            |               |                |                 | x               |                |                  |                |                |                |               |
| Davenport 2002                                         | CC                          | UK                                          |                  |                  |                  |                 | x          |               |                |                 | x               | x              | x                |                |                | x              | x             |
| Dortbudak 2005                                         | Cohort                      | Austria                                     |                  |                  |                  |                 |            |               | x              |                 | x               |                |                  |                | x              | x              |               |
| Ercan 2012                                             | Cohort                      | Turkey                                      |                  |                  |                  |                 | x          |               |                |                 |                 |                |                  |                |                |                |               |
| Gazolla 2007                                           | Cohort                      | Brazil                                      |                  |                  |                  |                 |            |               |                |                 |                 |                |                  |                |                |                | x             |

|                     |        |              |   |   |   |   |   |   |   |   |   |   |   |   |  |  |   |   |   |
|---------------------|--------|--------------|---|---|---|---|---|---|---|---|---|---|---|---|--|--|---|---|---|
| Glesse 2004         | CC     | Brazil       |   |   |   |   |   |   |   |   |   |   |   |   |  |  | X |   |   |
| Goepfert 2004       | CC     | USA          |   |   |   |   |   |   | X |   |   |   |   |   |  |  | X |   |   |
| Gomes Filho 2006    | CC     | Brazil       |   |   |   |   | X |   | X |   |   |   |   |   |  |  |   |   | X |
| Jarjoura 2005       | CC     | USA          |   |   |   |   |   |   | X |   |   |   |   |   |  |  | X |   |   |
| Jeffcoat 2001       | Cohort | USA          |   |   |   |   |   |   | X |   |   |   | X |   |  |  | X |   |   |
| Khader 2009         | CC     | Jordan       |   | X |   |   | X |   | X |   |   |   |   | X |  |  |   |   |   |
| Konopka 2003        | CC     | Poland       |   |   |   |   |   |   | X |   |   |   |   |   |  |  | X | X | X |
| Lopez 2002a         | Cohort | Chile        |   |   |   |   |   |   |   |   |   | X |   |   |  |  |   |   |   |
| Lopez 2002b         | CC     | Chile        |   |   | X | X |   |   | X |   | X | X |   |   |  |  |   |   |   |
| Louro 2001          | CC     | Brazil       |   |   |   |   |   |   |   |   |   |   |   |   |  |  | X |   |   |
| Lunardelli 2005     | CS     | Brazil       |   |   |   |   |   |   | X |   |   |   |   |   |  |  | X | X |   |
| Madianos 2001       | CS     | USA          |   |   |   |   |   |   |   |   |   |   | X |   |  |  |   |   |   |
| Marakoglu 2008      | CC     | Turkey       |   |   |   |   |   |   | X |   |   |   |   |   |  |  |   |   |   |
| Marin 2005          | CS     | Brazil       |   |   |   |   |   |   |   |   |   |   |   |   |  |  | X |   |   |
| Mitchell-Lewis 2001 | Cohort | USA          |   |   |   |   |   |   |   |   | X | X |   |   |  |  |   | X | X |
| Mokeem 2004         | CC     | Saudi-Arabia |   |   |   |   |   |   |   |   | X |   |   |   |  |  | X | X | X |
| Molitero 2005       | CC     | Brazil       |   |   |   |   |   |   | X |   |   |   |   |   |  |  | X | X | X |
| Moore 2004a         | Cohort | UK           |   |   |   |   |   |   | X |   |   |   |   |   |  |  | X |   |   |
| Moore 2005          | CC     | UK           |   | X |   |   |   |   |   |   |   |   |   |   |  |  |   |   |   |
| Mumghamba 2007      | CC     | Tanzania     |   |   |   |   | X |   |   |   |   |   |   |   |  |  |   |   |   |
| Noack 2005          | CC     | Germany      |   |   |   |   | X |   | X |   | X |   |   |   |  |  | X | X | X |
| Offenbacher 1996    | CC     | USA          |   |   |   |   | X | X | X | X | X | X | X |   |  |  | X | X | X |
| Offenbacher 1998    | CC     | USA          |   |   |   |   |   |   |   | X |   | X | X |   |  |  |   | X |   |
| Offenbacher 2001    | Cohort | USA          |   |   |   |   |   |   |   |   |   |   | X |   |  |  |   |   |   |
| Radnai 2004         | CC     | Hungary      |   |   |   |   |   |   |   |   |   |   |   |   |  |  | X |   |   |
| Radnai 2006         | CC     | Hungary      |   |   |   |   |   |   | X |   | X |   |   |   |  |  |   |   |   |
| Rajapakse 2005      | Cohort | Sri Lanka    | X | X |   |   |   |   | X |   |   |   |   |   |  |  | X |   |   |

|                   |        |            |   |  |   |   |   |  |   |  |  |  |  |  |   |   |   |
|-------------------|--------|------------|---|--|---|---|---|--|---|--|--|--|--|--|---|---|---|
| Rakoto-Alson 2010 | Cohort | Madagascar | x |  | x | x | x |  |   |  |  |  |  |  |   |   |   |
| Robles 2004       | CC     | Peru       |   |  |   |   |   |  |   |  |  |  |  |  |   | x |   |
| Saddki 2008       | Cohort | Malaysia   | x |  |   |   |   |  |   |  |  |  |  |  |   |   |   |
| Santa Cruz 2013   | Cohort | Spain      |   |  |   | x |   |  |   |  |  |  |  |  |   |   |   |
| Sharma 2007       | Cohort | Fiji       | x |  |   |   |   |  |   |  |  |  |  |  |   |   |   |
| Siqueira 2007     | CC     | Brazil     |   |  |   |   |   |  | x |  |  |  |  |  |   |   |   |
| Smitha 2013       | CC     | India      |   |  |   |   |   |  |   |  |  |  |  |  | x |   |   |
| Toygar 2007       | CC     | Turkey     |   |  |   |   |   |  |   |  |  |  |  |  |   |   |   |
| Vettore 2008      | CC     | Brazil     |   |  |   |   | x |  |   |  |  |  |  |  |   |   | x |

**ABBREVIATIONS**

CC – Case control

USA – United States of America

UK – United Kingdom

CS – Cross sectional
